# Supplementary material for: Synthesis and Telomeric G-Quadruplex-Stabilizing Ability of Macrocyclic Hexaoxazoles Bearing Three Side Chains
Source: PubMed Central journal article supplement (PMC6358838; doi:10.3390/molecules24020263), 2019-01-11

## Supporting information

### Synthesis of macrocyclic hexaoxazoles with tri-substituted side chains and their stabilization ability of telomeric G-quadruplex

Yue Ma <sup>1</sup>, Keisuke Iida <sup>2</sup>, Shogo Sasaki <sup>1</sup>, Takatsugu Hirokawa <sup>3,4,5</sup>, Brahim Heddi <sup>6</sup>, Anh-Tuân Phan <sup>6</sup>, Kazuo Nagasawa <sup>1,\*</sup>

1. Department of Biotechnology and Life Science, Tokyo University of Agriculture and Technology, 2-24-16 Naka-cho, Koganei, Tokyo 184-8588 (Japan)
2. Department of Chemistry, Chiba University, 1-33 Yayoi, Inage, Chiba 263-8522 (Japan)
3. Transborder Medical Research center, University of Tsukuba, 1-1-1 Tennodai, Tsukuba, 305-8575 (Japan)
4. Division of Biomedical Science, University of Tsukuba, 1-1-1 Tennodai, Tsukuba, 305-8575 (Japan)
5. Molecular Profiling Research Center for Drug Discovery, National Institute of Advanced Industrial Science and Technology, 2-4-7 Aomi, Koto-ward, Tokyo 135-0064 (Japan)
6. Division of Physics and Applied Physics, Nanyang Technological University, Singapore 637371 (Singapore)

\*E-mail: knaga@cc.tuat.ac.jp

#### Table of Contents:

|                                                                                                                                                                                                          |    |
|----------------------------------------------------------------------------------------------------------------------------------------------------------------------------------------------------------|----|
| 1. Supplementary Tables (S1, S2)                                                                                                                                                                         | S2 |
| 2. Supplementary Figures (S1, S2)                                                                                                                                                                        | S4 |
| 3. <sup>1</sup> H and <sup>13</sup> C NMR spectra for <b>10</b> , <b>11</b> , <b>13</b> , <b>3</b> , <b>16a</b> , <b>4a</b> , <b>16b</b> , <b>4b</b> , <b>19a</b> , <b>5a</b> , <b>19b</b> , <b>5b</b> . | S5 |

## 1. Supplementary Tables

Table S1. Sequences of oligonucleotides used in this paper

| Oligonucleotide   | Sequence                                                          |
|-------------------|-------------------------------------------------------------------|
| Flu-telo21        | 5'-FAM-d[GGG TTA GGG TTA GGG TTA GGG]-TAMRA-3'                    |
| Flu- <i>c-kit</i> | 5'-FAM-d[GGG AGG GCG CTG GGA GGA GGG]-TAMRA-3'                    |
| Flu- <i>K-ras</i> | 5'-FAM-d[AGG GCG GTG TGG GAA GAG GGA AGA GGG GGA GG]-<br>TAMRA-3' |
| Flu-dsDNA         | 5'-FAM-d[TAT AGC TAT ATT TTT TTA TAG CTA TA]-TAMRA-3'             |
| telo24            | 5'-d[TTA GGG TTA GGG TTA GGG TTA GGG]- 3'                         |

Table S2. Energy profiles of docking study of top 100 poses for compounds **3**, **4a**, **4b**, **5a**, and **5b** with parallel-type telomeric G4.

|           | <b>3</b> | <b>4a</b> | <b>4b</b> | <b>5a</b> | <b>5b</b> |            | <b>3</b> | <b>4a</b> | <b>4b</b> | <b>5a</b> | <b>5b</b> |
|-----------|----------|-----------|-----------|-----------|-----------|------------|----------|-----------|-----------|-----------|-----------|
| <b>1</b>  | -9.055   | -10.328   | -10.329   | -10.434   | -10.612   | <b>51</b>  | -8.501   | -9.293    | -9.061    | -9.587    |           |
| <b>2</b>  | -8.48    | -10.242   | -10.287   | -10.277   | -10.594   | <b>52</b>  | -8.46    | -9.28     | -9.061    | -9.577    |           |
| <b>3</b>  |          | -10.111   | -10.27    | -10.229   | -10.544   | <b>53</b>  | -8.457   | -9.25     | -9.042    | -9.563    |           |
| <b>4</b>  |          | -10.037   | -10.253   | -10.161   | -10.492   | <b>54</b>  | -8.448   | -9.249    | -9.042    | -9.562    |           |
| <b>5</b>  |          | -9.754    | -10.242   | -10.039   | -10.441   | <b>55</b>  | -8.423   | -9.249    | -9.036    | -9.556    |           |
| <b>6</b>  |          | -9.681    | -10.221   | -9.982    | -10.396   | <b>56</b>  | -8.394   | -9.242    | -9.03     | -9.551    |           |
| <b>7</b>  |          | -9.596    | -10.205   | -9.831    | -10.378   | <b>57</b>  | -8.392   | -9.236    | -9.023    | -9.551    |           |
| <b>8</b>  |          | -9.553    | -10.184   | -9.808    | -10.356   | <b>58</b>  | -8.377   | -9.229    | -9.013    | -9.55     |           |
| <b>9</b>  |          | -9.521    | -10.128   | -9.753    | -10.344   | <b>59</b>  | -8.356   | -9.203    | -9.007    | -9.513    |           |
| <b>10</b> |          | -9.439    | -10.089   | -9.721    | -10.202   | <b>60</b>  | -8.343   | -9.196    | -8.994    | -9.51     |           |
| <b>11</b> |          | -9.438    | -9.994    | -9.715    | -10.188   | <b>61</b>  | -8.331   | -9.188    | -8.988    | -9.503    |           |
| <b>12</b> |          | -9.43     | -9.978    | -9.693    | -10.038   | <b>62</b>  | -8.308   | -9.183    | -8.974    | -9.47     |           |
| <b>13</b> |          | -9.429    | -9.939    | -9.667    | -10.035   | <b>63</b>  | -8.306   | -9.171    | -8.973    | -9.451    |           |
| <b>14</b> |          | -9.32     | -9.938    | -9.642    | -10.032   | <b>64</b>  | -8.286   | -9.169    | -8.97     | -9.447    |           |
| <b>15</b> |          | -9.308    | -9.874    | -9.636    | -10.03    | <b>65</b>  | -8.26    | -9.148    | -8.964    | -9.437    |           |
| <b>16</b> |          | -9.307    | -9.872    | -9.629    | -10.002   | <b>66</b>  | -8.257   | -9.098    | -8.958    | -9.412    |           |
| <b>17</b> |          | -9.282    | -9.822    | -9.609    | -9.97     | <b>67</b>  | -8.224   | -9.091    | -8.941    | -9.412    |           |
| <b>18</b> |          | -9.267    | -9.806    | -9.588    | -9.97     | <b>68</b>  | -8.22    | -9.075    | -8.933    | -9.397    |           |
| <b>19</b> |          | -9.265    | -9.789    | -9.537    | -9.967    | <b>69</b>  | -8.217   | -9.037    | -8.923    | -9.392    |           |
| <b>20</b> |          | -9.257    | -9.78     | -9.492    | -9.963    | <b>70</b>  | -8.198   | -9.004    | -8.916    | -9.389    |           |
| <b>21</b> |          | -9.254    | -9.759    | -9.47     | -9.956    | <b>71</b>  | -8.174   | -9.003    | -8.915    | -9.388    |           |
| <b>22</b> |          | -9.252    | -9.754    | -9.4      | -9.953    | <b>72</b>  | -8.114   | -9.002    | -8.882    | -9.34     |           |
| <b>23</b> |          | -9.24     | -9.693    | -9.388    | -9.941    | <b>73</b>  | -8.081   | -8.981    | -8.88     | -9.339    |           |
| <b>24</b> |          | -9.184    | -9.684    | -9.382    | -9.927    | <b>74</b>  | -8.06    | -8.976    | -8.88     | -9.313    |           |
| <b>25</b> |          | -9.175    | -9.635    | -9.382    | -9.914    | <b>75</b>  | -8.055   | -8.966    | -8.876    | -9.299    |           |
| <b>26</b> |          | -9.168    | -9.63     | -9.38     | -9.908    | <b>76</b>  | -8.028   | -8.963    | -8.854    | -9.255    |           |
| <b>27</b> |          | -9.161    | -9.619    | -9.366    | -9.875    | <b>77</b>  | -8.005   | -8.957    | -8.852    | -9.238    |           |
| <b>28</b> |          | -9.147    | -9.615    | -9.363    | -9.87     | <b>78</b>  | -7.977   | -8.954    | -8.851    | -9.23     |           |
| <b>29</b> |          | -9.103    | -9.609    | -9.361    | -9.869    | <b>79</b>  | -7.969   | -8.942    | -8.842    | -9.201    |           |
| <b>30</b> |          | -9.061    | -9.603    | -9.361    | -9.858    | <b>80</b>  | -7.967   | -8.925    | -8.822    | -9.173    |           |
| <b>31</b> |          | -9.021    | -9.595    | -9.314    | -9.856    | <b>81</b>  | -7.951   | -8.915    | -8.811    | -9.169    |           |
| <b>32</b> |          | -9.011    | -9.554    | -9.275    | -9.853    | <b>82</b>  | -7.949   | -8.911    | -8.795    | -9.169    |           |
| <b>33</b> |          | -8.988    | -9.554    | -9.27     | -9.847    | <b>83</b>  | -7.945   | -8.892    | -8.792    | -9.157    |           |
| <b>34</b> |          | -8.978    | -9.543    | -9.258    | -9.833    | <b>84</b>  | -7.942   | -8.871    | -8.777    | -9.147    |           |
| <b>35</b> |          | -8.974    | -9.531    | -9.251    | -9.822    | <b>85</b>  | -7.929   | -8.854    | -8.777    | -9.132    |           |
| <b>36</b> |          | -8.967    | -9.52     | -9.249    | -9.815    | <b>86</b>  | -7.923   | -8.837    | -8.757    | -9.124    |           |
| <b>37</b> |          | -8.96     | -9.492    | -9.178    | -9.804    | <b>87</b>  | -7.911   | -8.813    | -8.738    | -9.12     |           |
| <b>38</b> |          | -8.954    | -9.49     | -9.177    | -9.803    | <b>88</b>  | -7.908   | -8.781    | -8.733    | -9.087    |           |
| <b>39</b> |          | -8.934    | -9.458    | -9.17     | -9.789    | <b>89</b>  | -7.904   | -8.741    | -8.718    | -9.084    |           |
| <b>40</b> |          | -8.898    | -9.454    | -9.164    | -9.778    | <b>90</b>  | -7.897   | -8.731    | -8.639    | -9.083    |           |
| <b>41</b> |          | -8.889    | -9.454    | -9.15     | -9.775    | <b>91</b>  | -7.897   | -8.714    | -8.611    | -9.083    |           |
| <b>42</b> |          | -8.883    | -9.446    | -9.137    | -9.765    | <b>92</b>  | -7.879   | -8.702    | -8.595    | -9.067    |           |
| <b>43</b> |          | -8.872    | -9.439    | -9.134    | -9.762    | <b>93</b>  | -7.878   | -8.668    | -8.579    | -9.056    |           |
| <b>44</b> |          | -8.786    | -9.417    | -9.121    | -9.752    | <b>94</b>  | -7.836   | -8.654    | -8.565    | -9.047    |           |
| <b>45</b> |          | -8.744    | -9.389    | -9.103    | -9.704    | <b>95</b>  | -7.527   | -8.646    | -8.485    | -9.039    |           |
| <b>46</b> |          | -8.728    | -9.387    | -9.102    | -9.68     | <b>96</b>  | -7.501   | -8.006    | -8.403    | -9.015    |           |
| <b>47</b> |          | -8.691    | -9.366    | -9.097    | -9.671    | <b>97</b>  | -7.272   | -7.916    | -8.153    | -8.965    |           |
| <b>48</b> |          | -8.685    | -9.358    | -9.087    | -9.668    | <b>98</b>  | -7.195   | -7.712    | -7.675    | -8.931    |           |
| <b>49</b> |          | -8.627    | -9.329    | -9.085    | -9.647    | <b>99</b>  | -7.172   | -7.457    | -7.503    | -8.916    |           |
| <b>50</b> |          | -8.614    | -9.319    | -9.071    | -9.62     | <b>100</b> | -7.07    | -7.43     | -7.38     | -8.827    |           |

## 2. Supplementary Figures

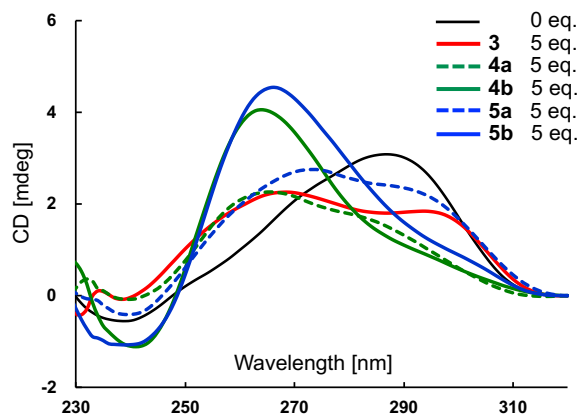

Figure S1. CD spectra of **3**, **4a**, **4b**, **5a**, and **5b** in the presence of telomeric G4 under potassium condition

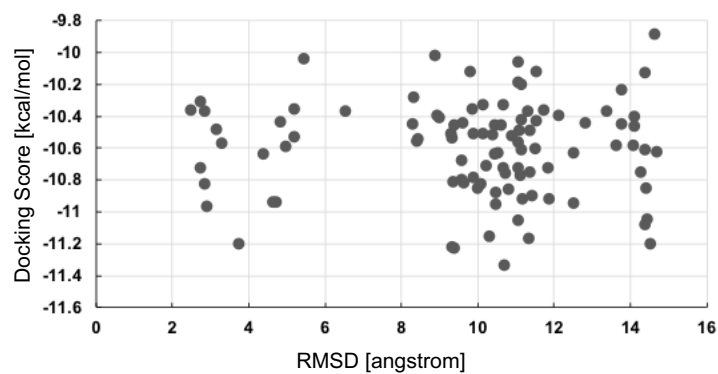

Figure S2. Correlation between the docking score and the RMSD of the top 100 poses for re-docking benchmark (PDB ID: 3UYH)

2.  $^1\text{H}$  and  $^{13}\text{C}$  NMR spectra for 10, 11, 13, 3, 16a, 4a, 16b, 4b, 19a, 5a, 19b, 5b.

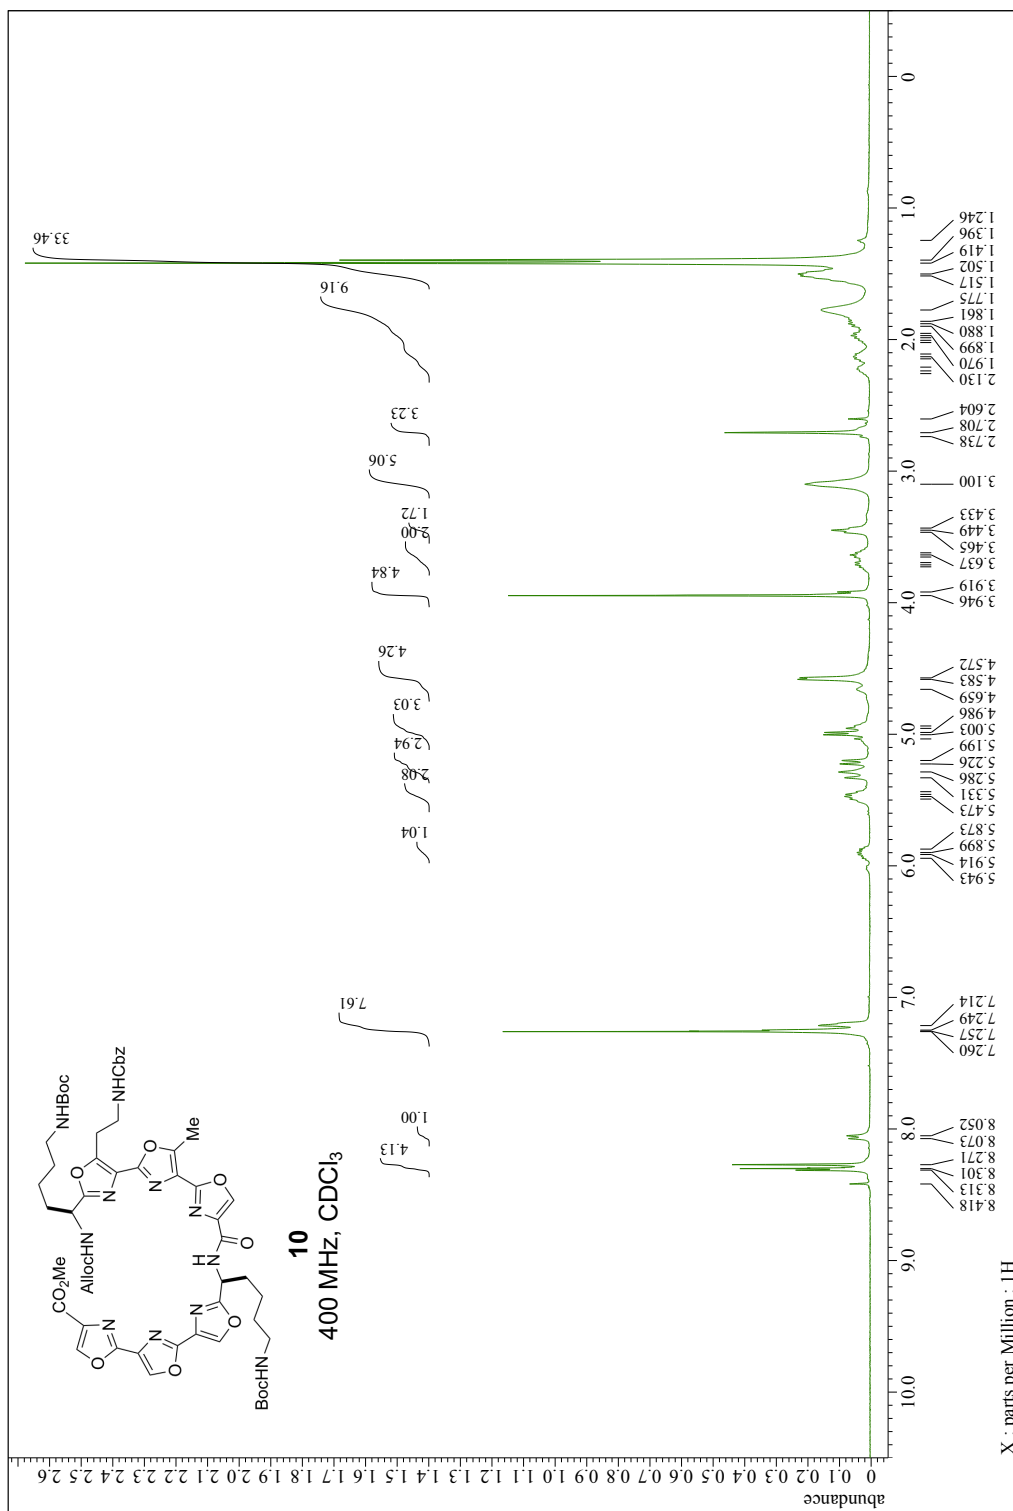

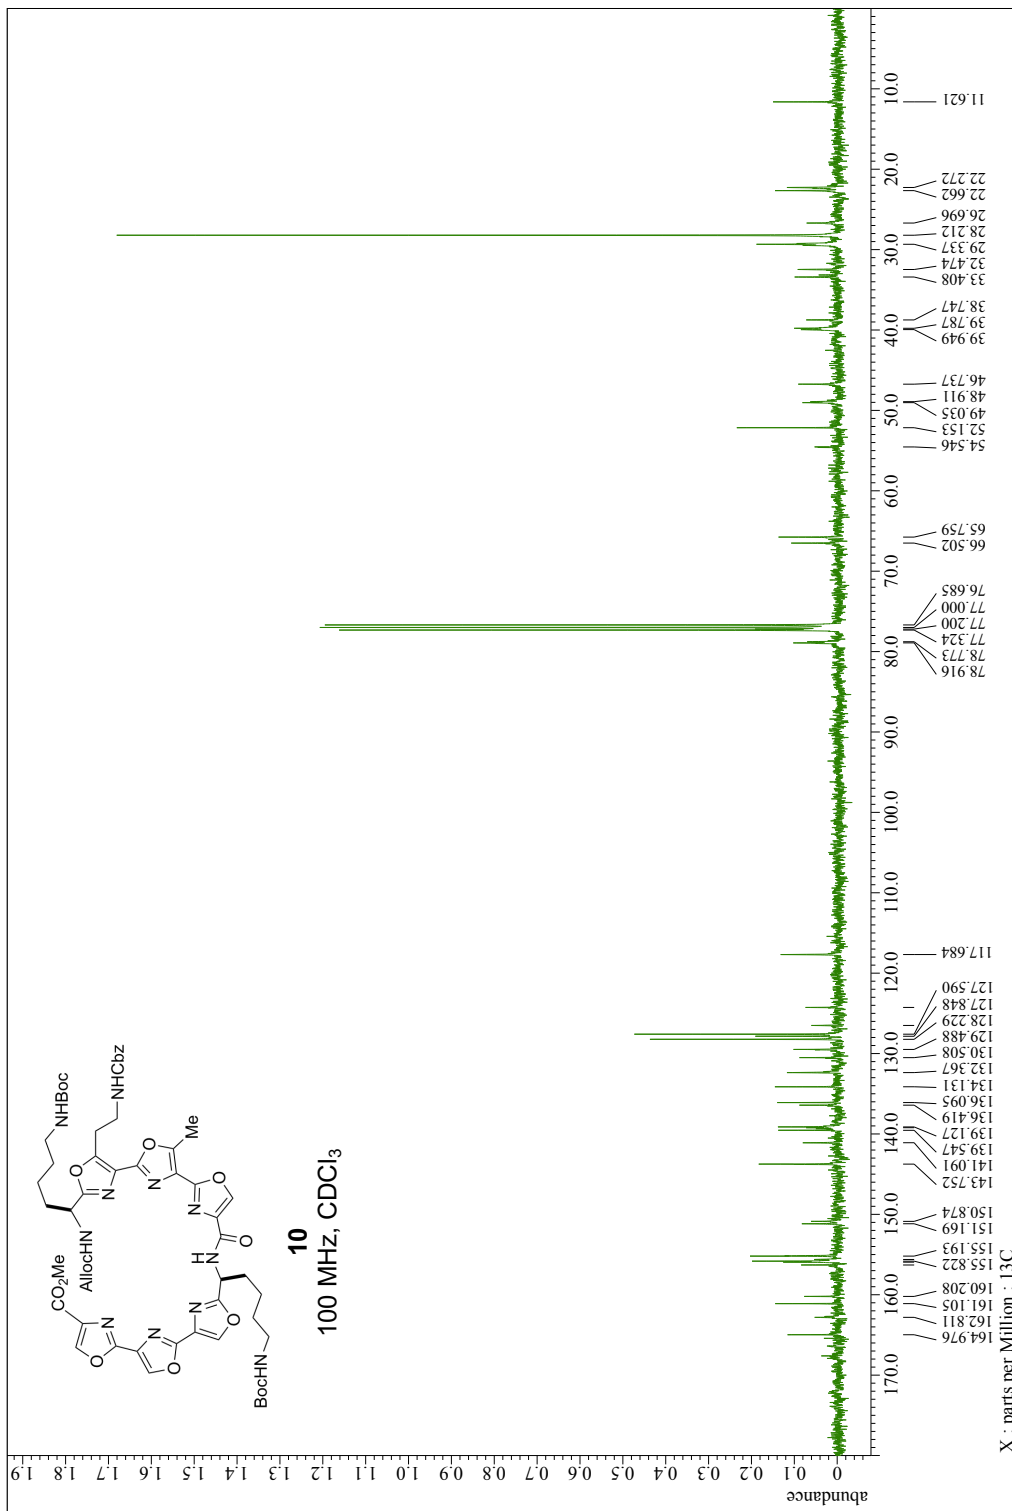

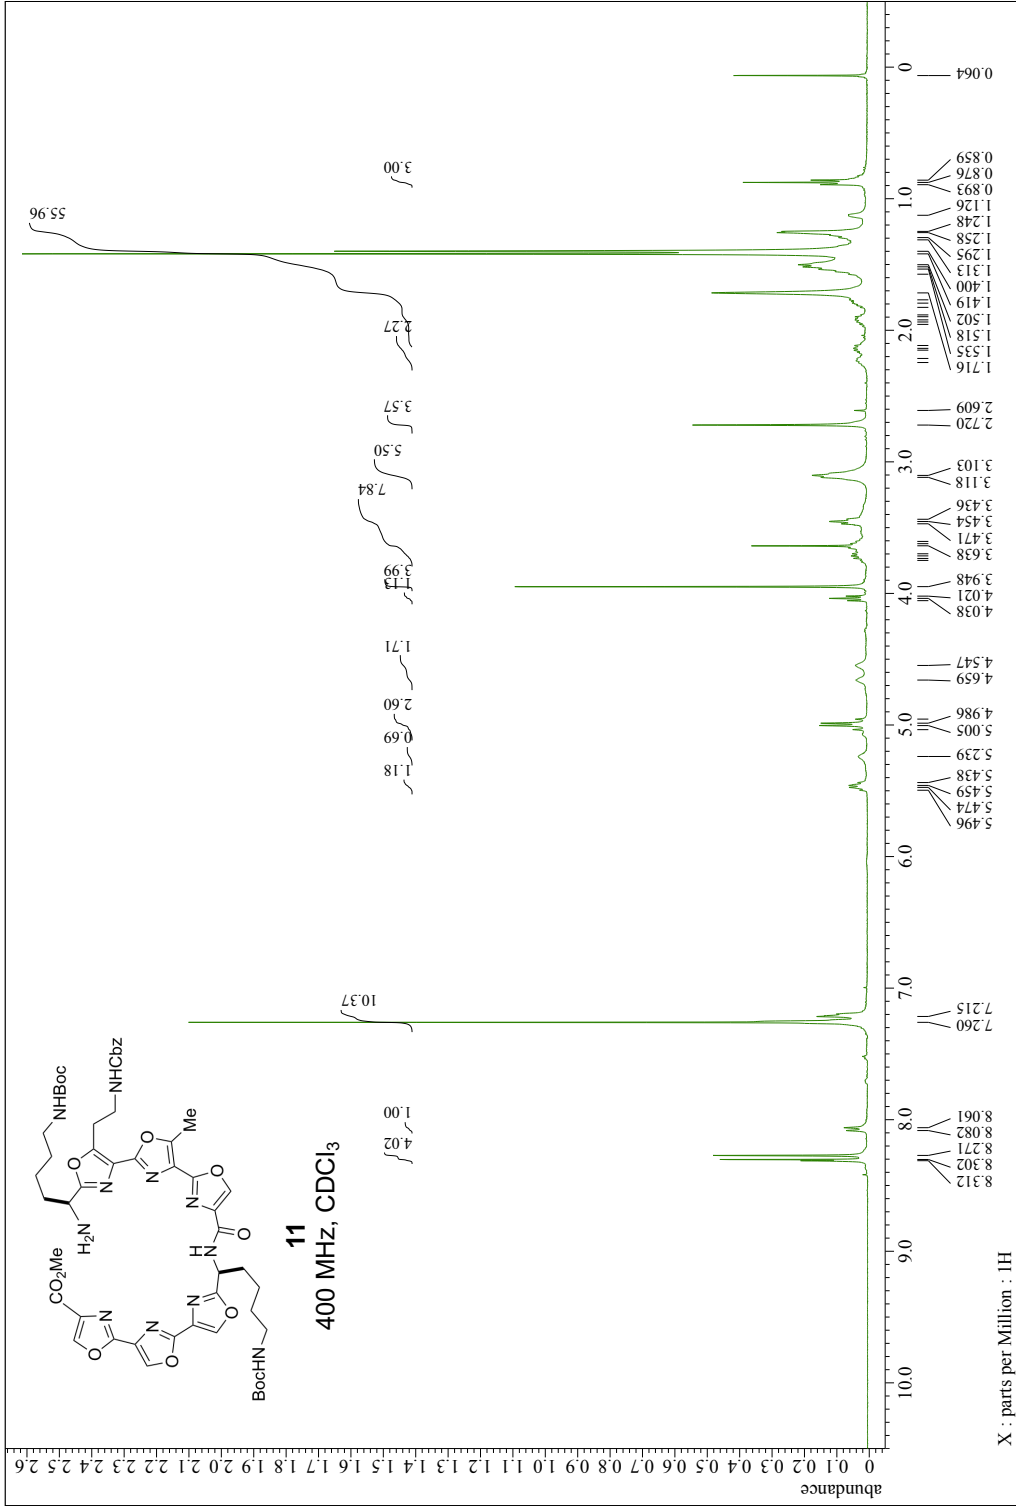

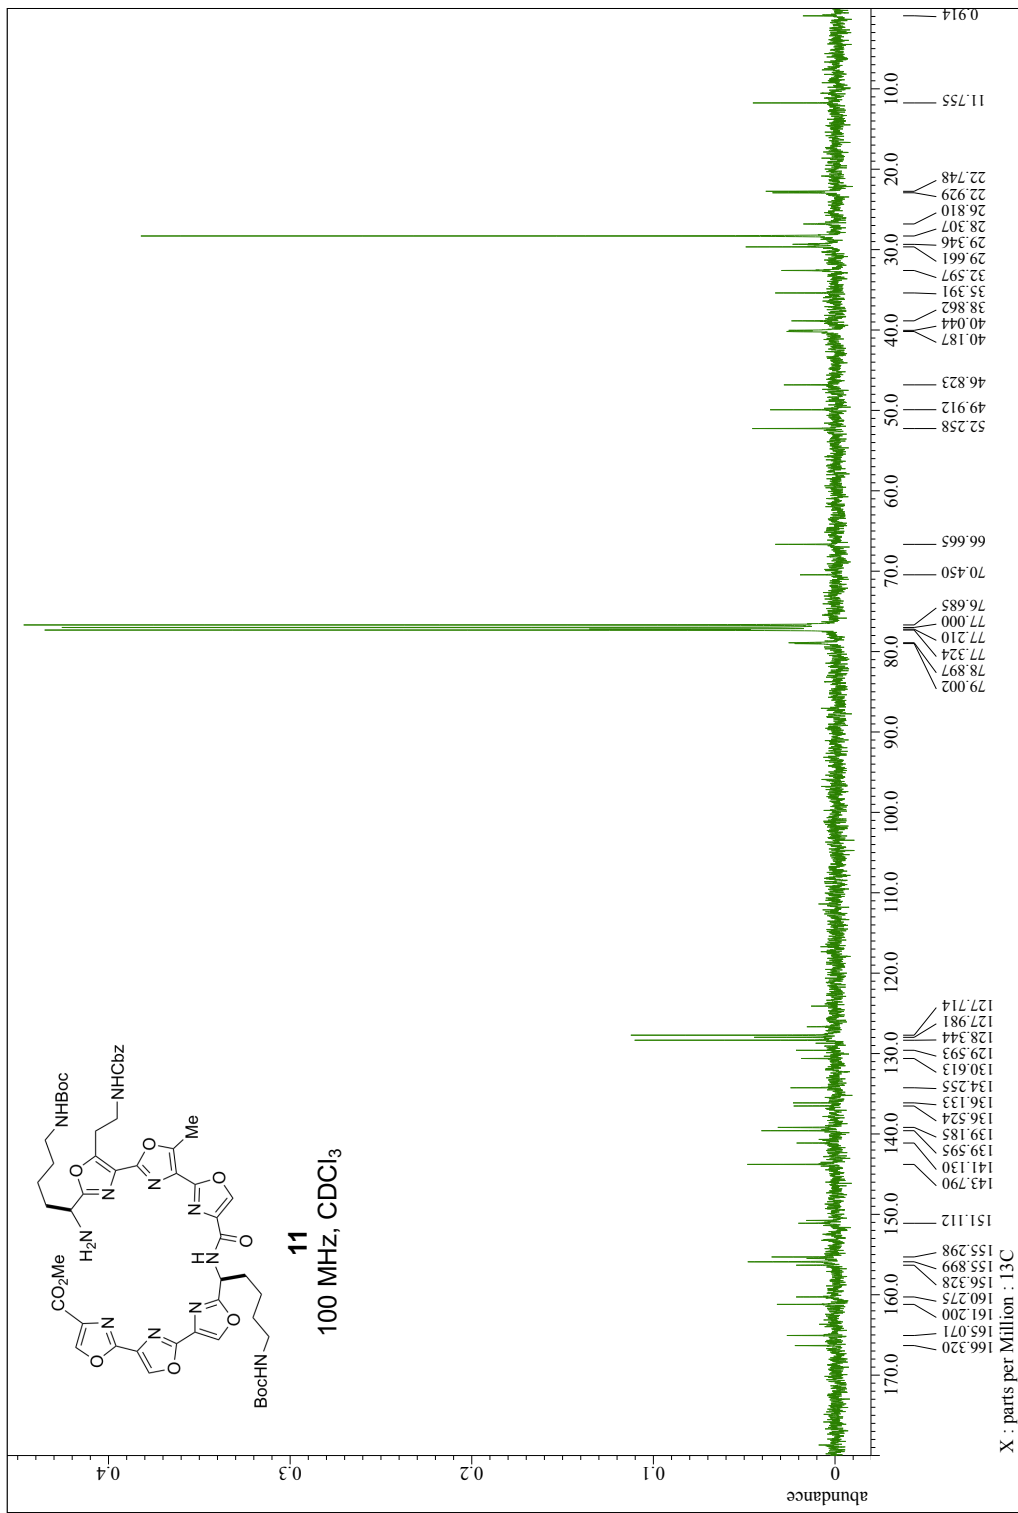



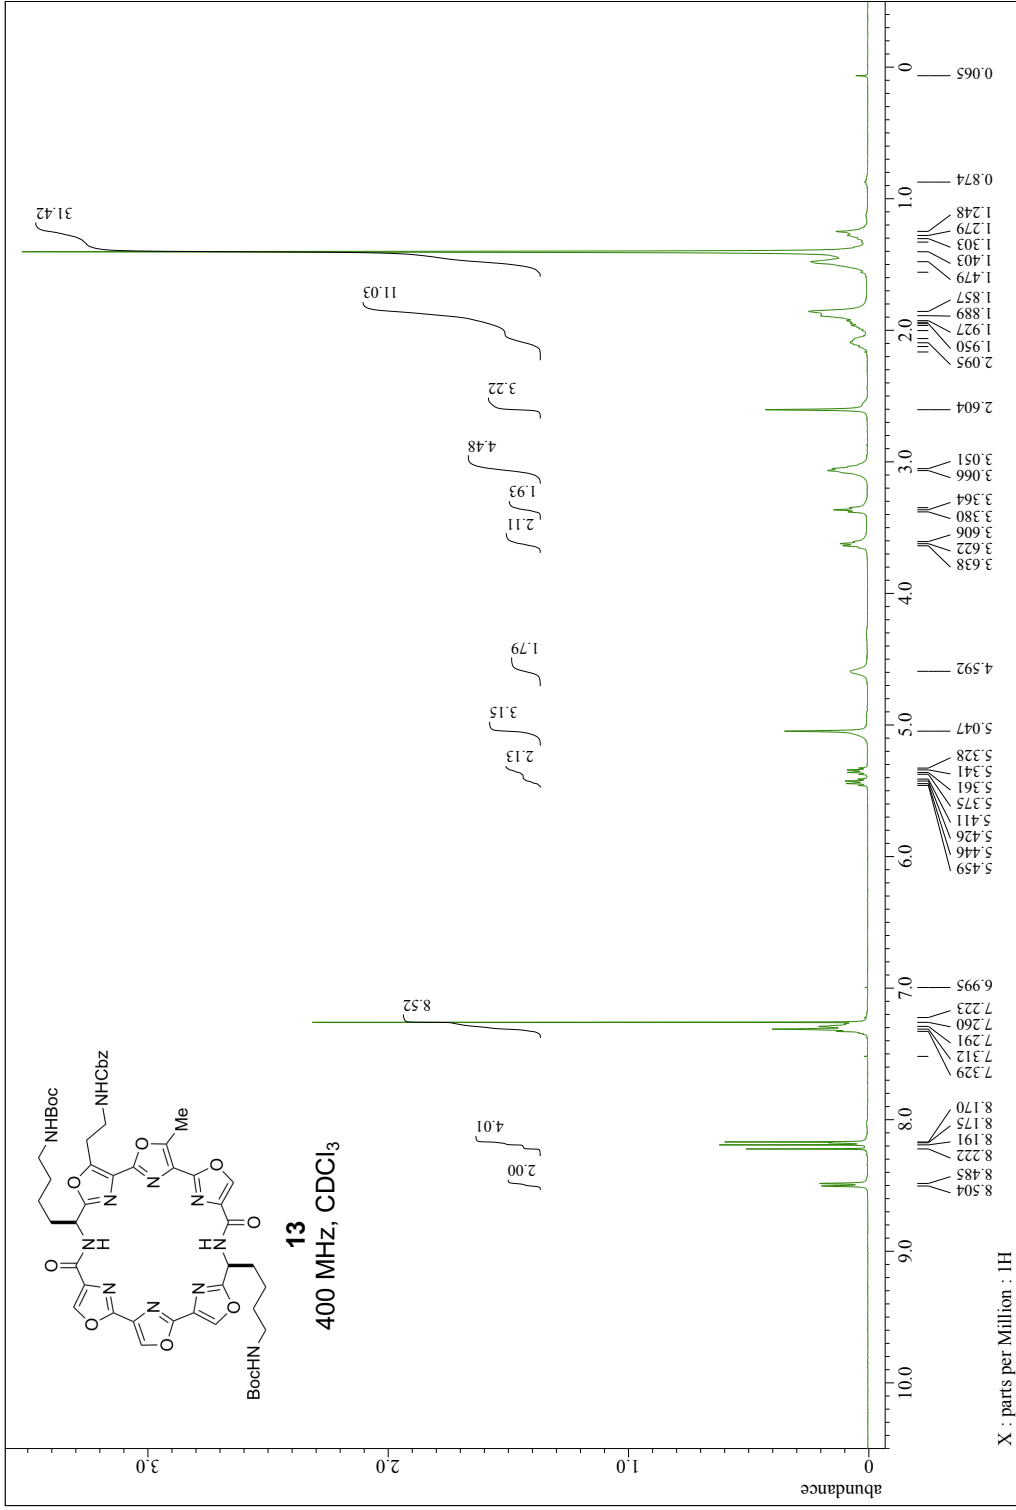

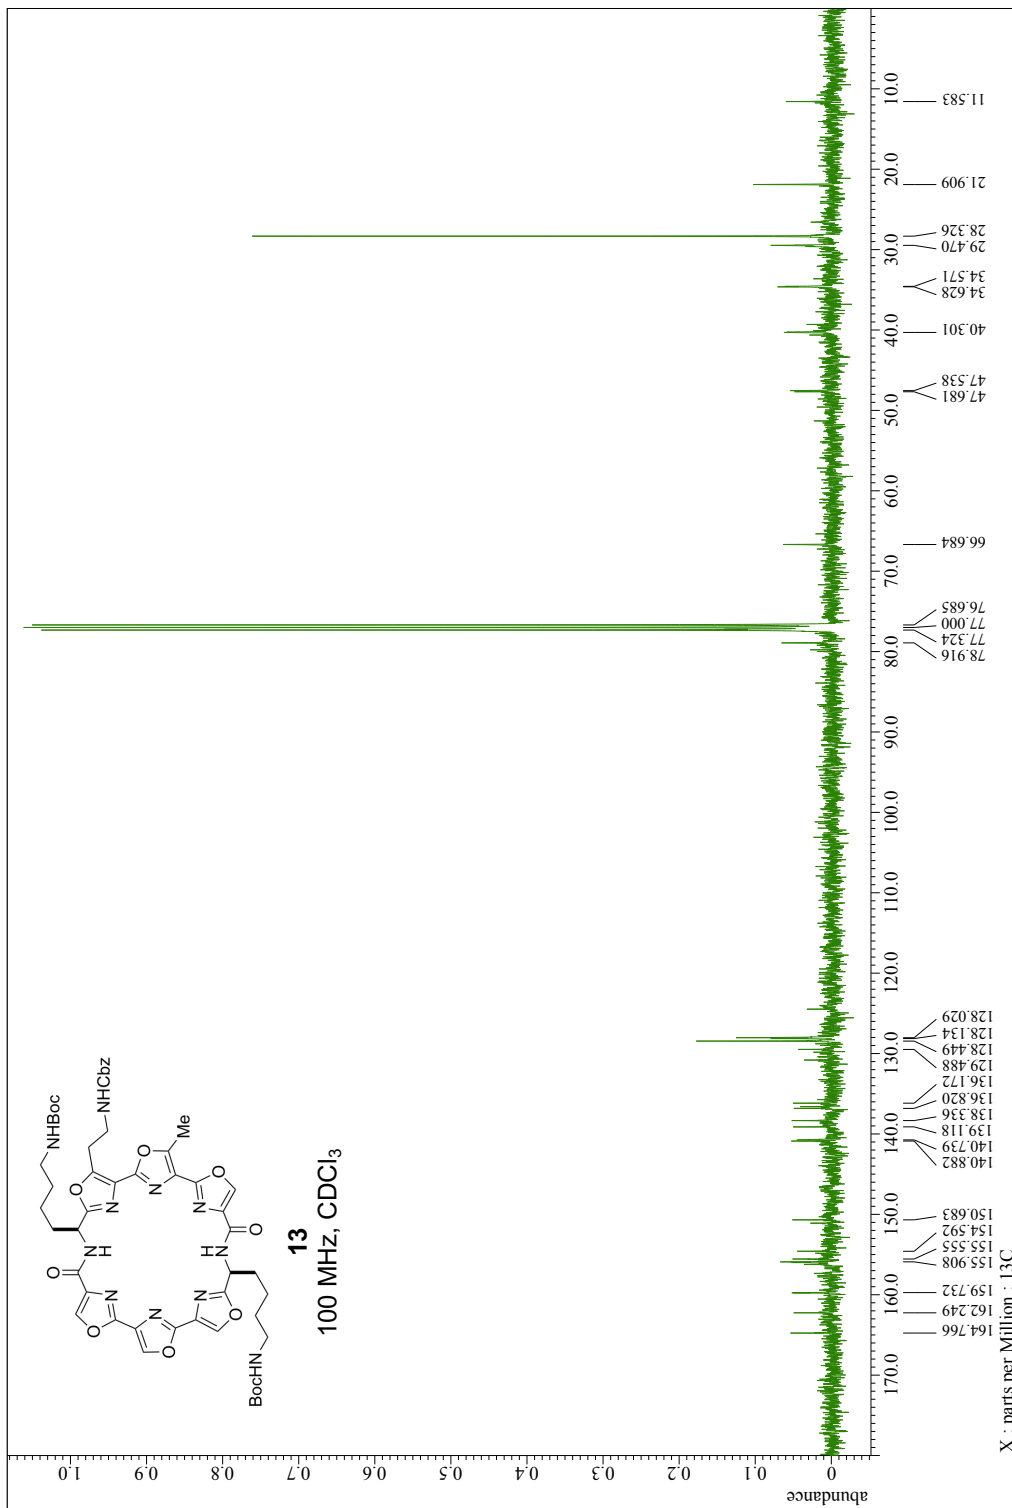

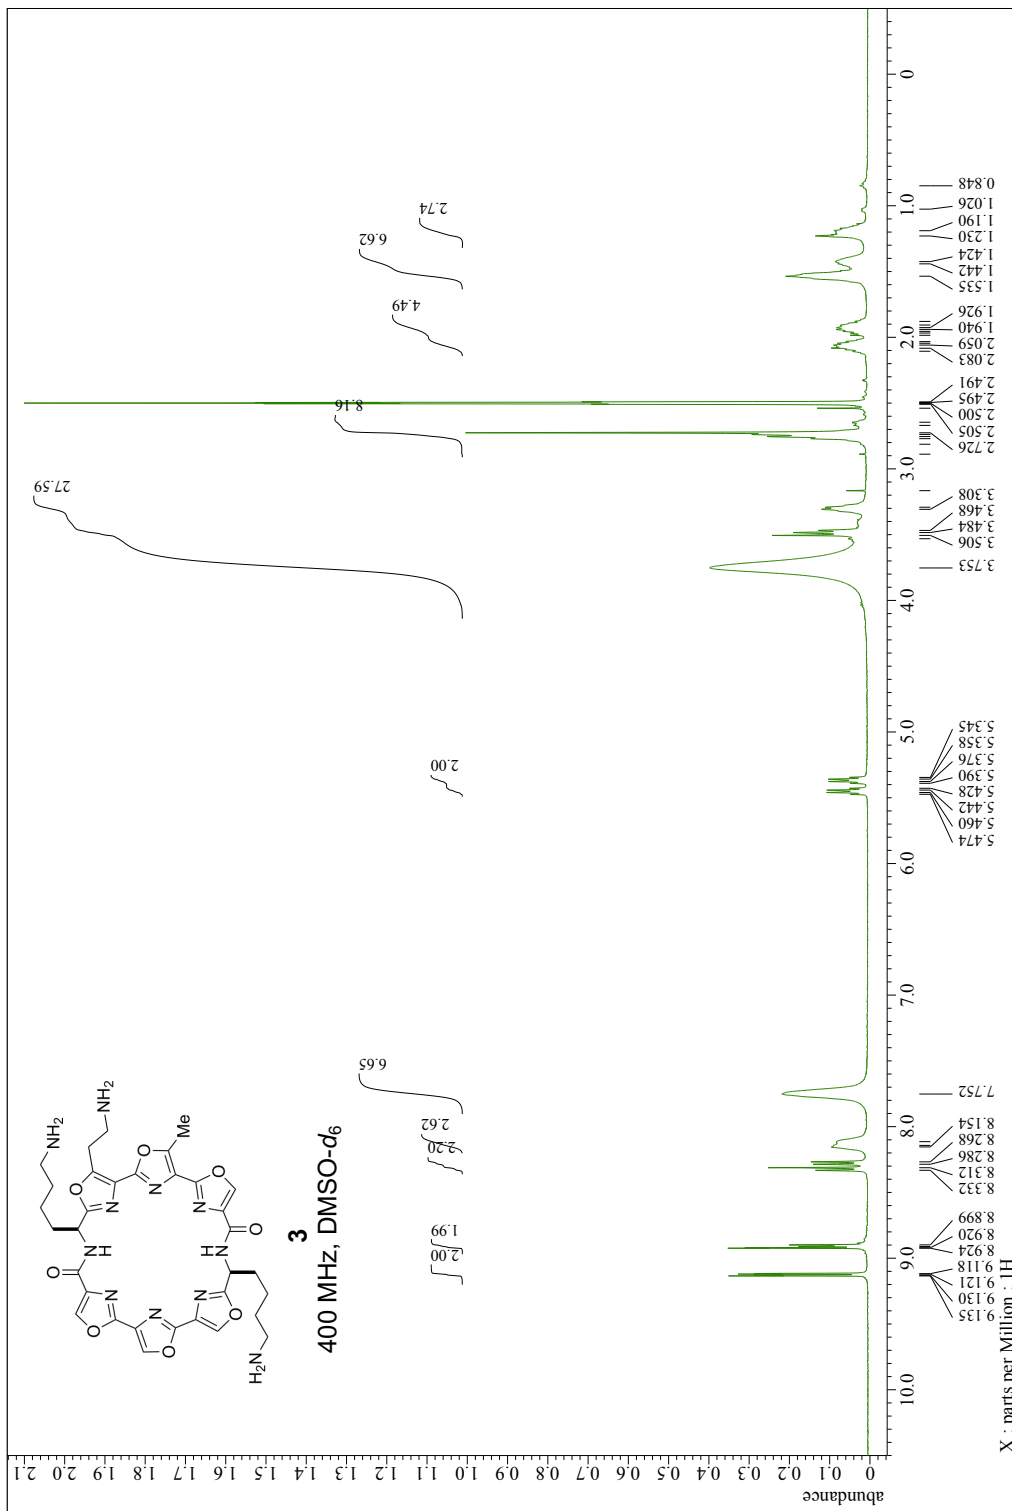

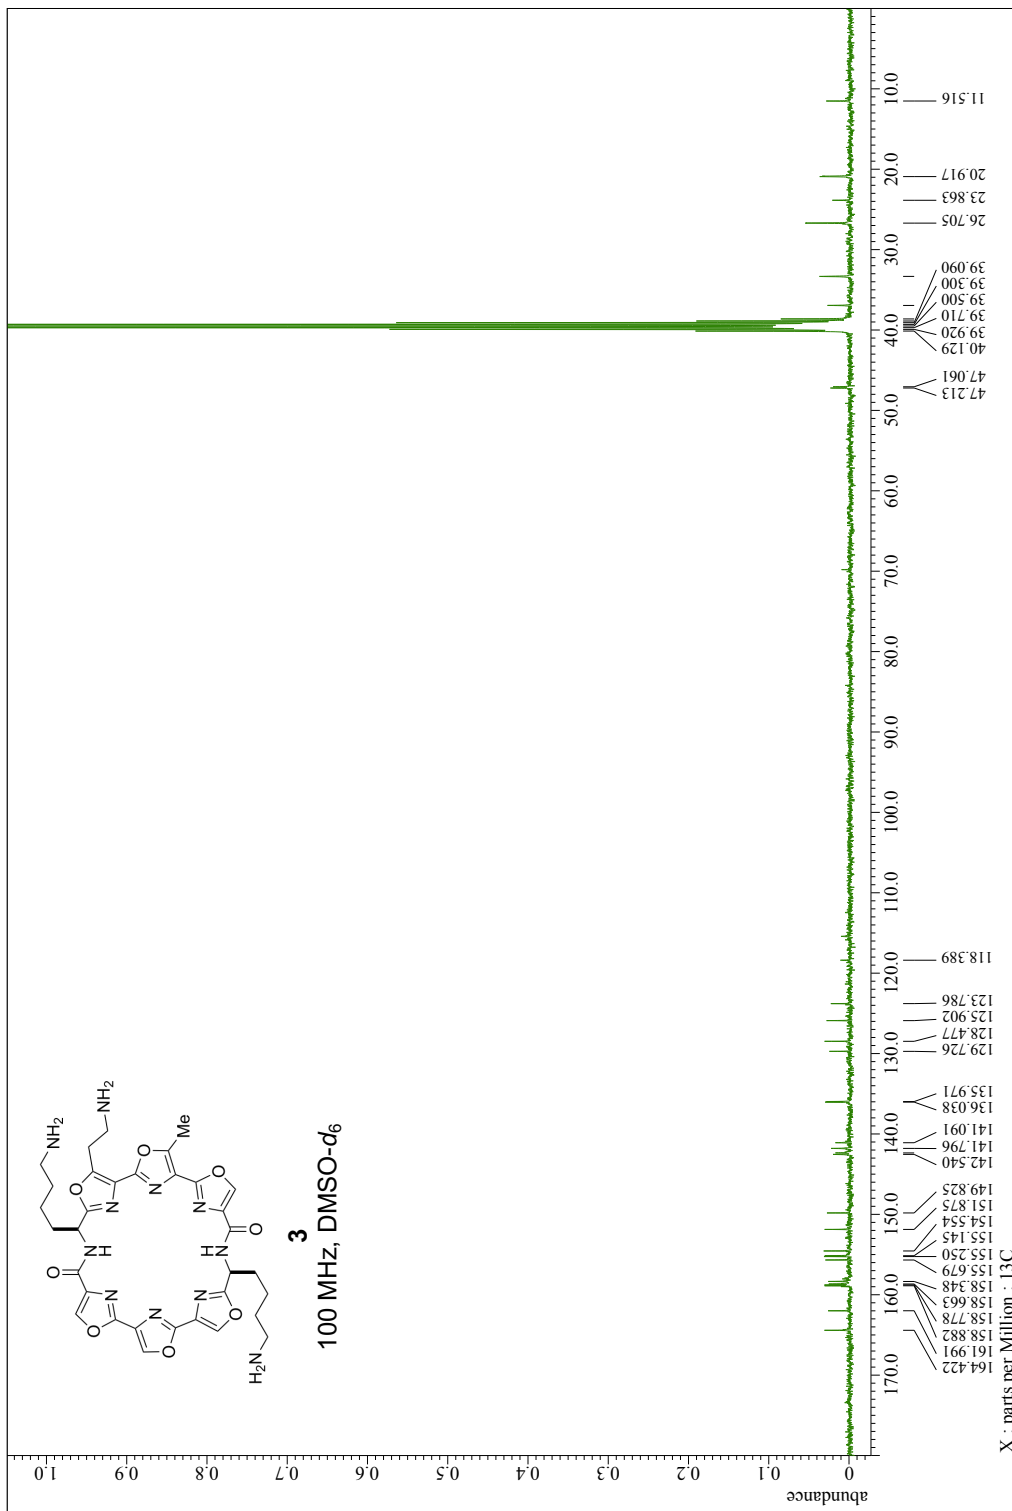

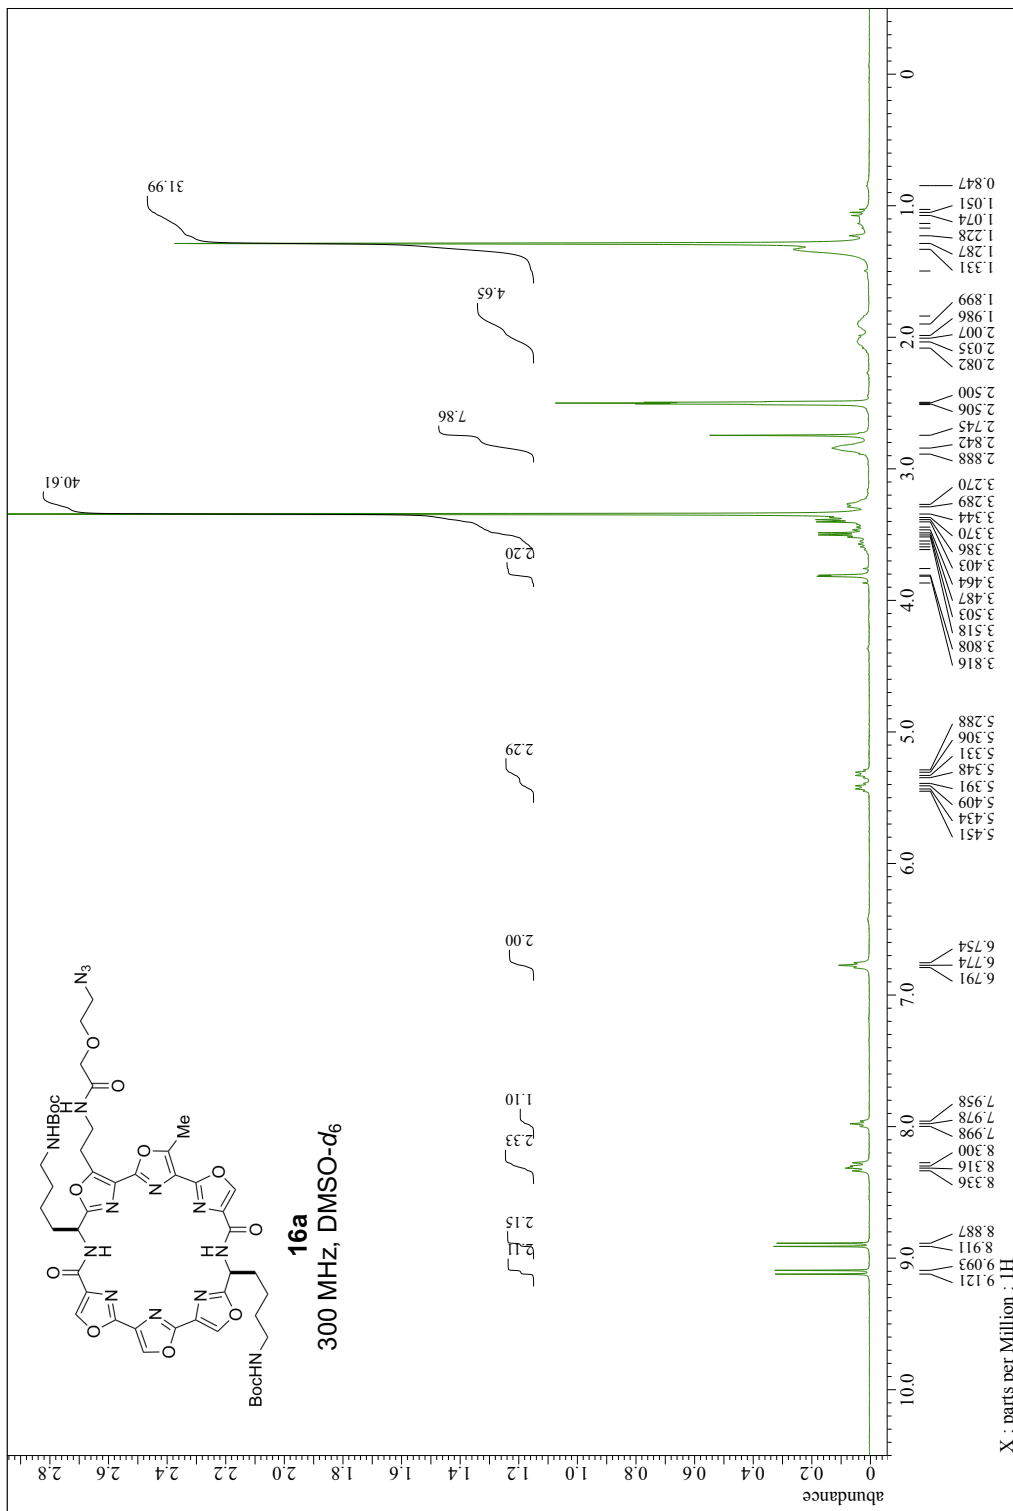

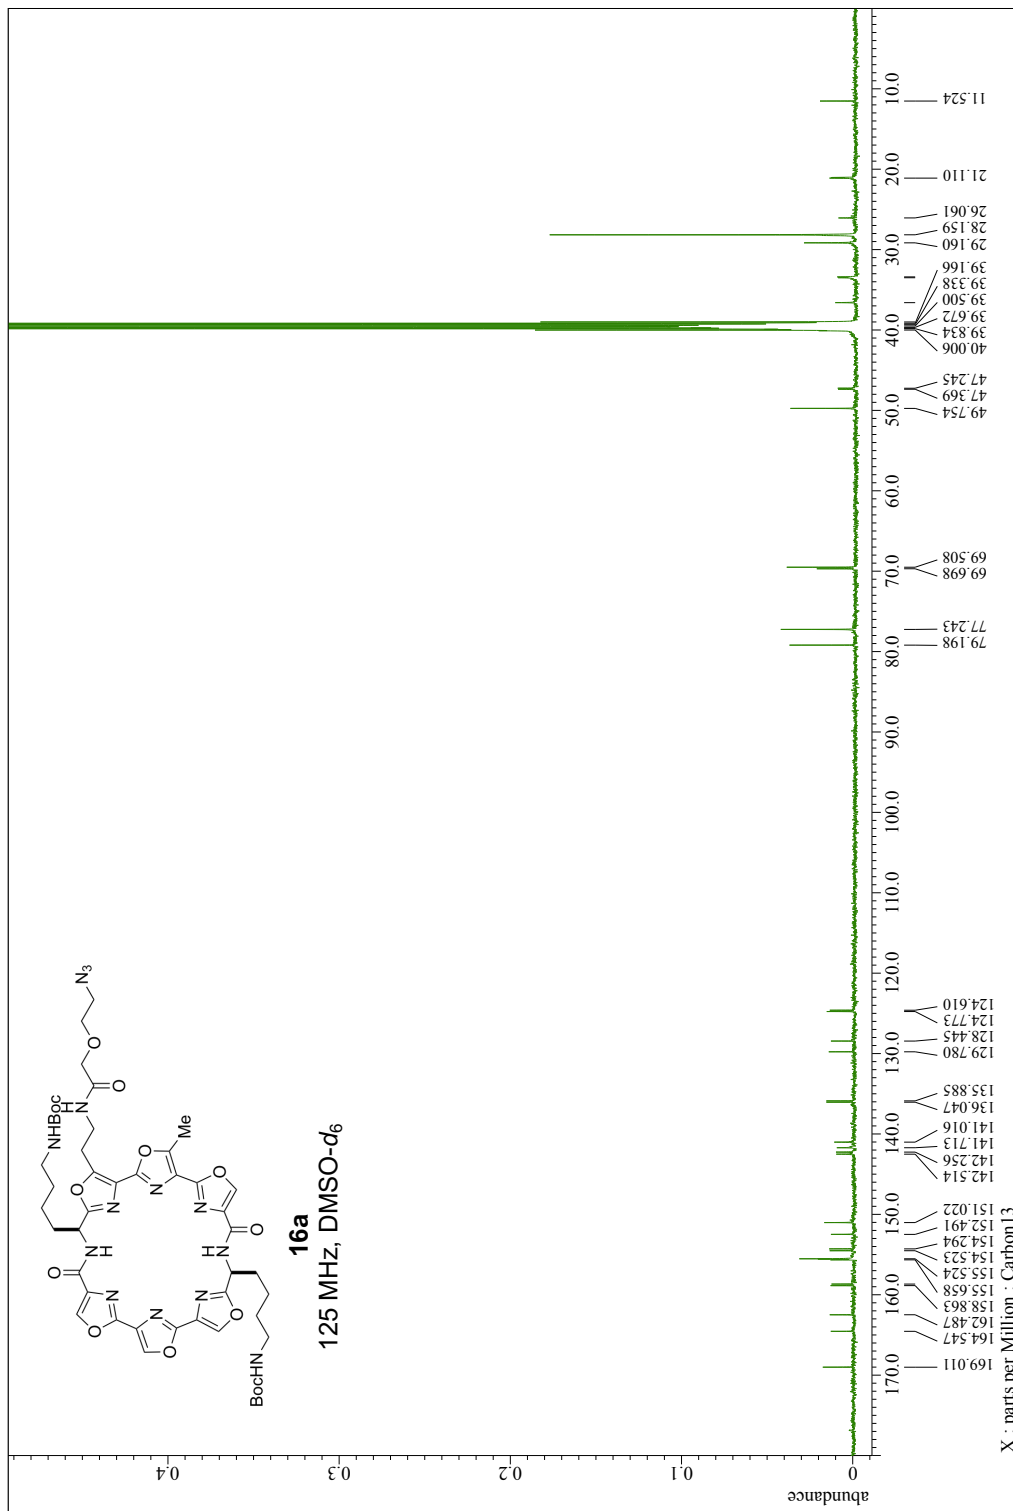

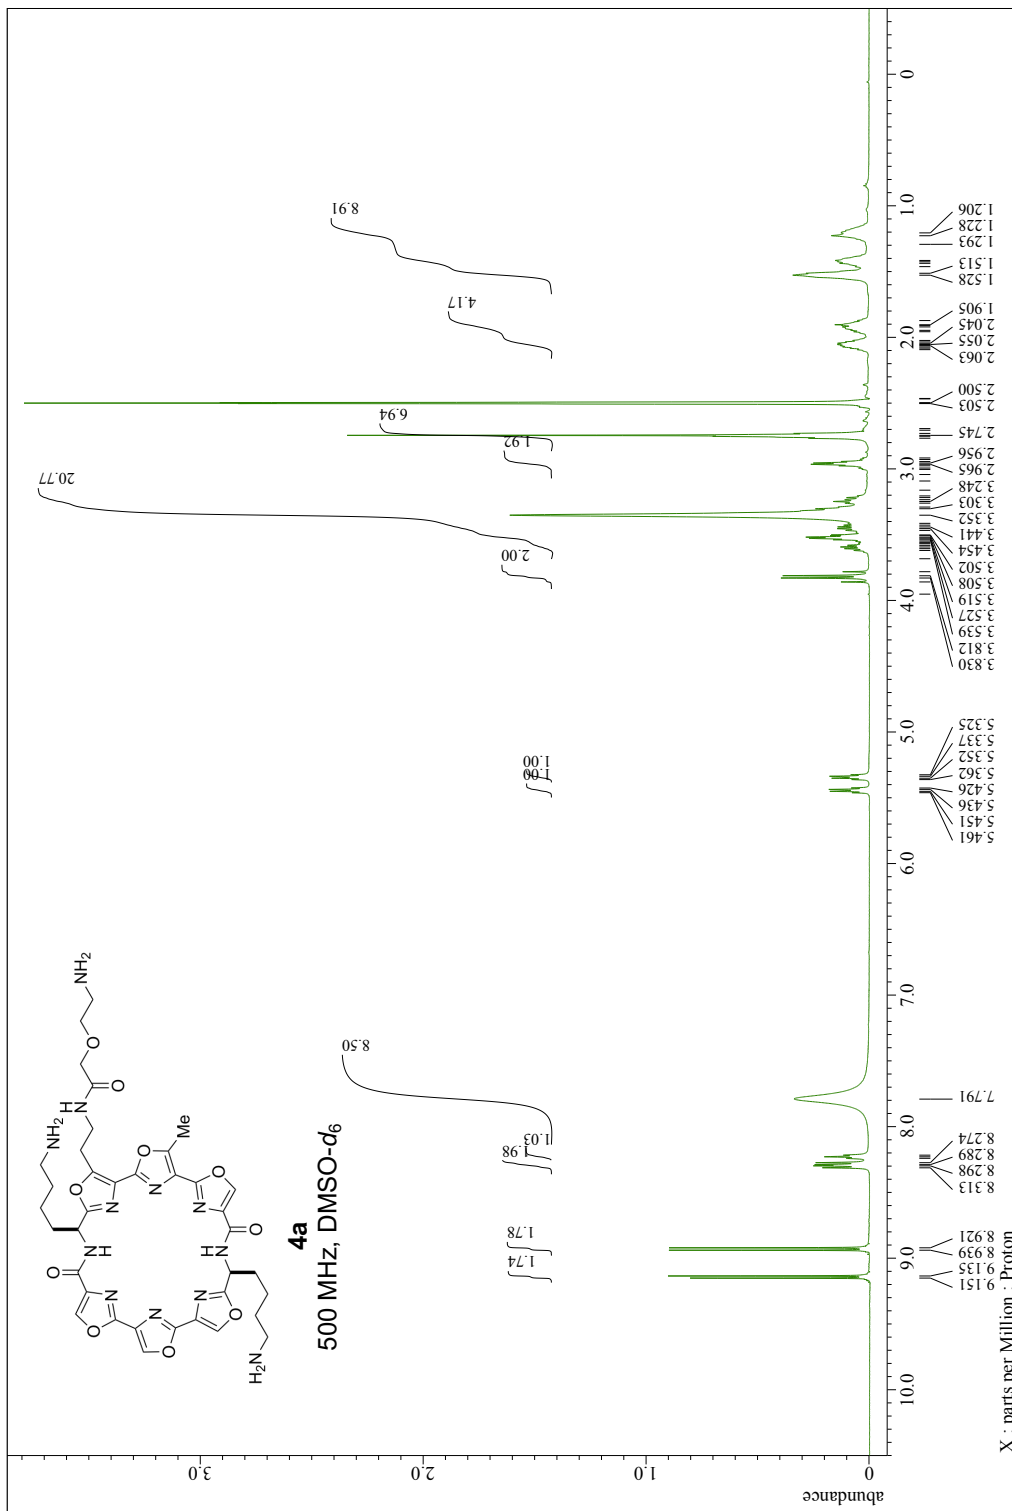

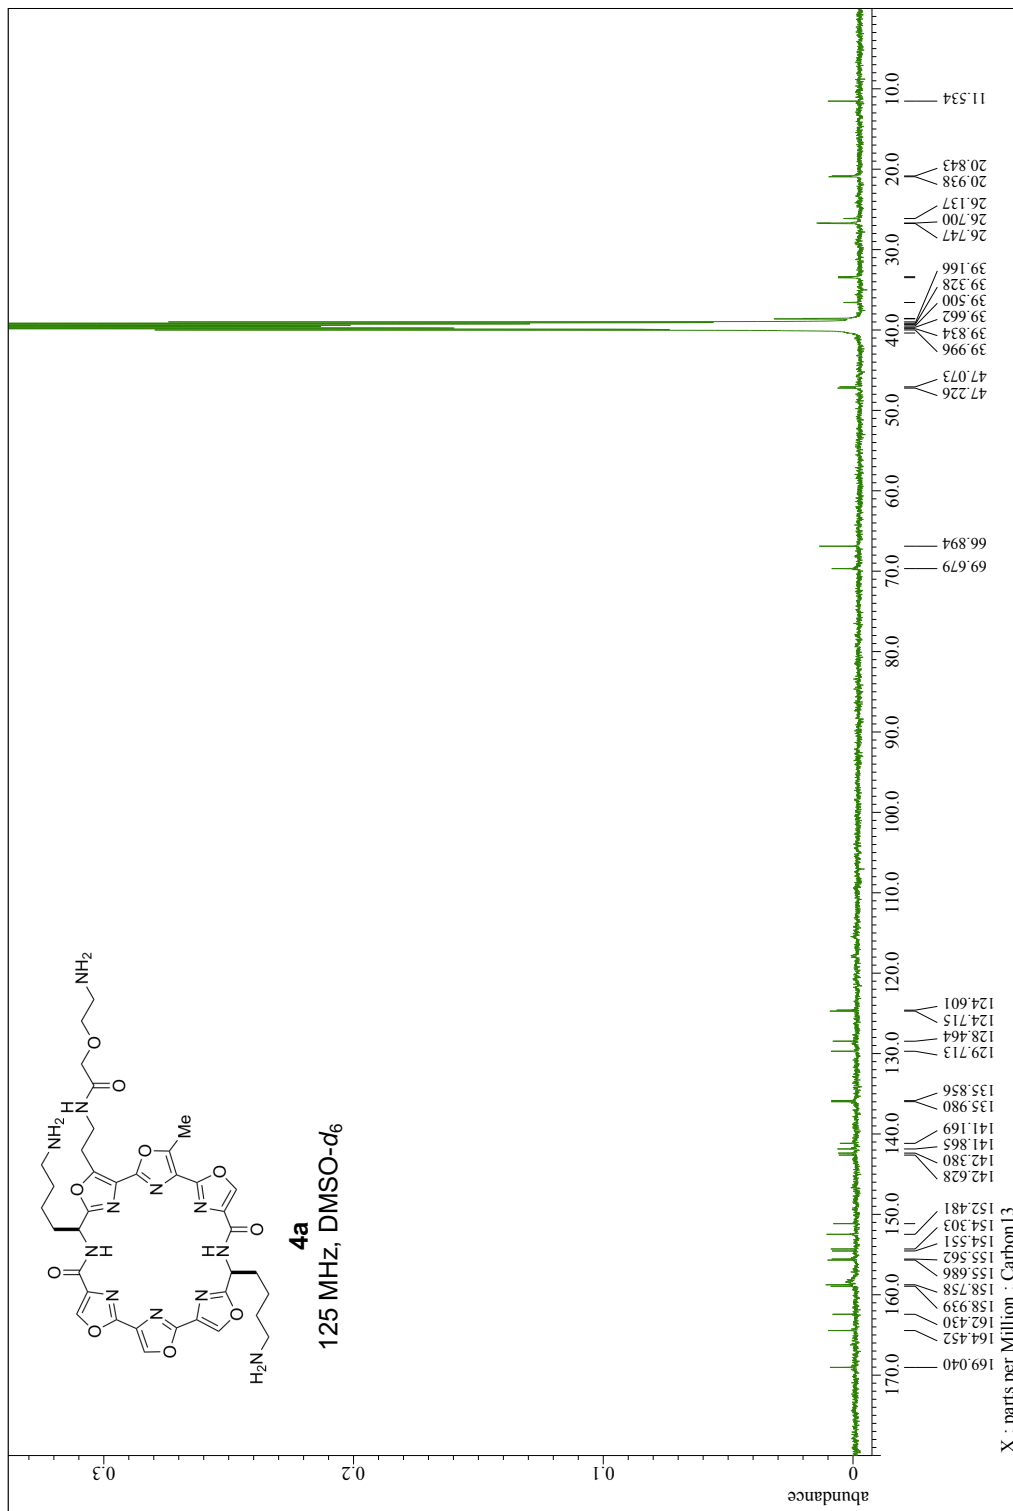



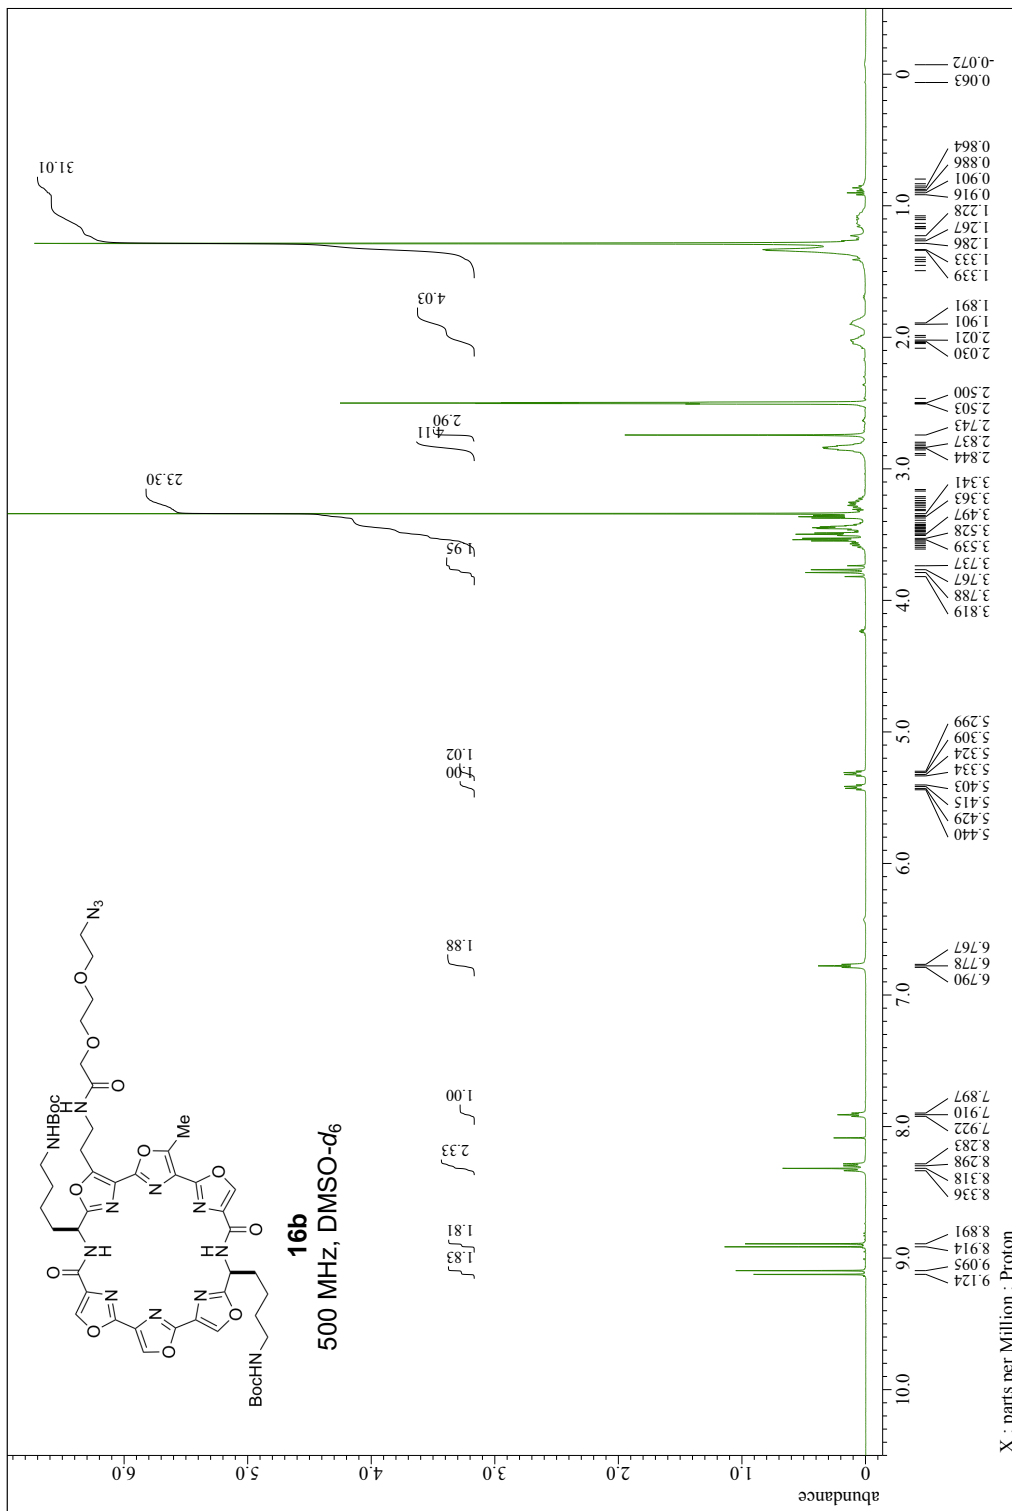

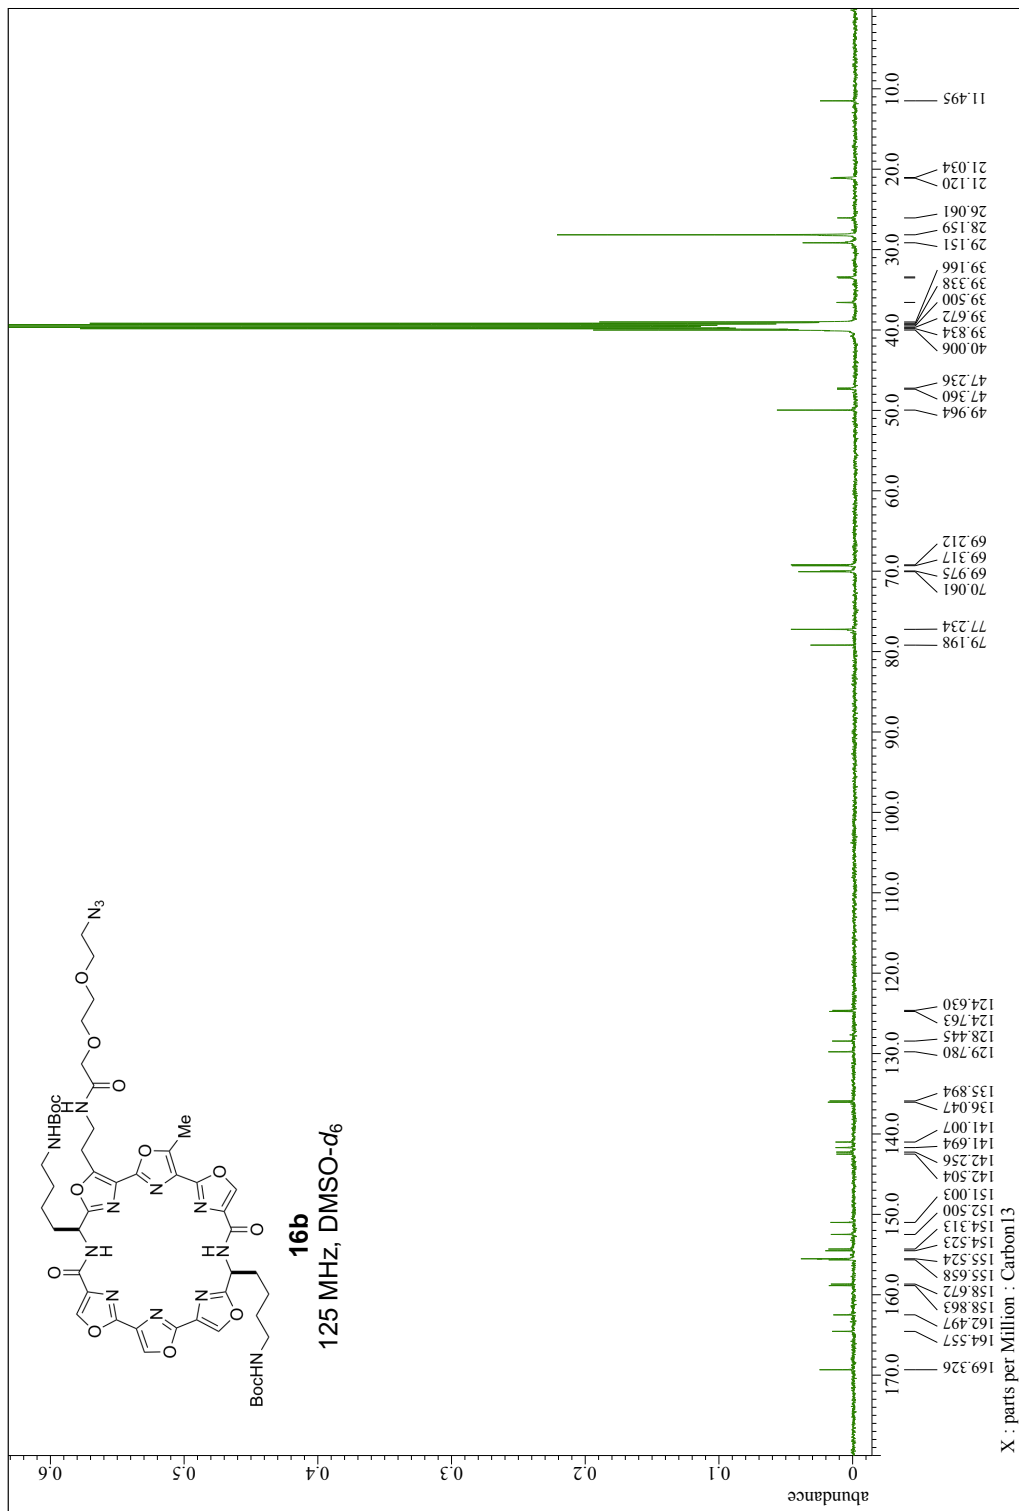

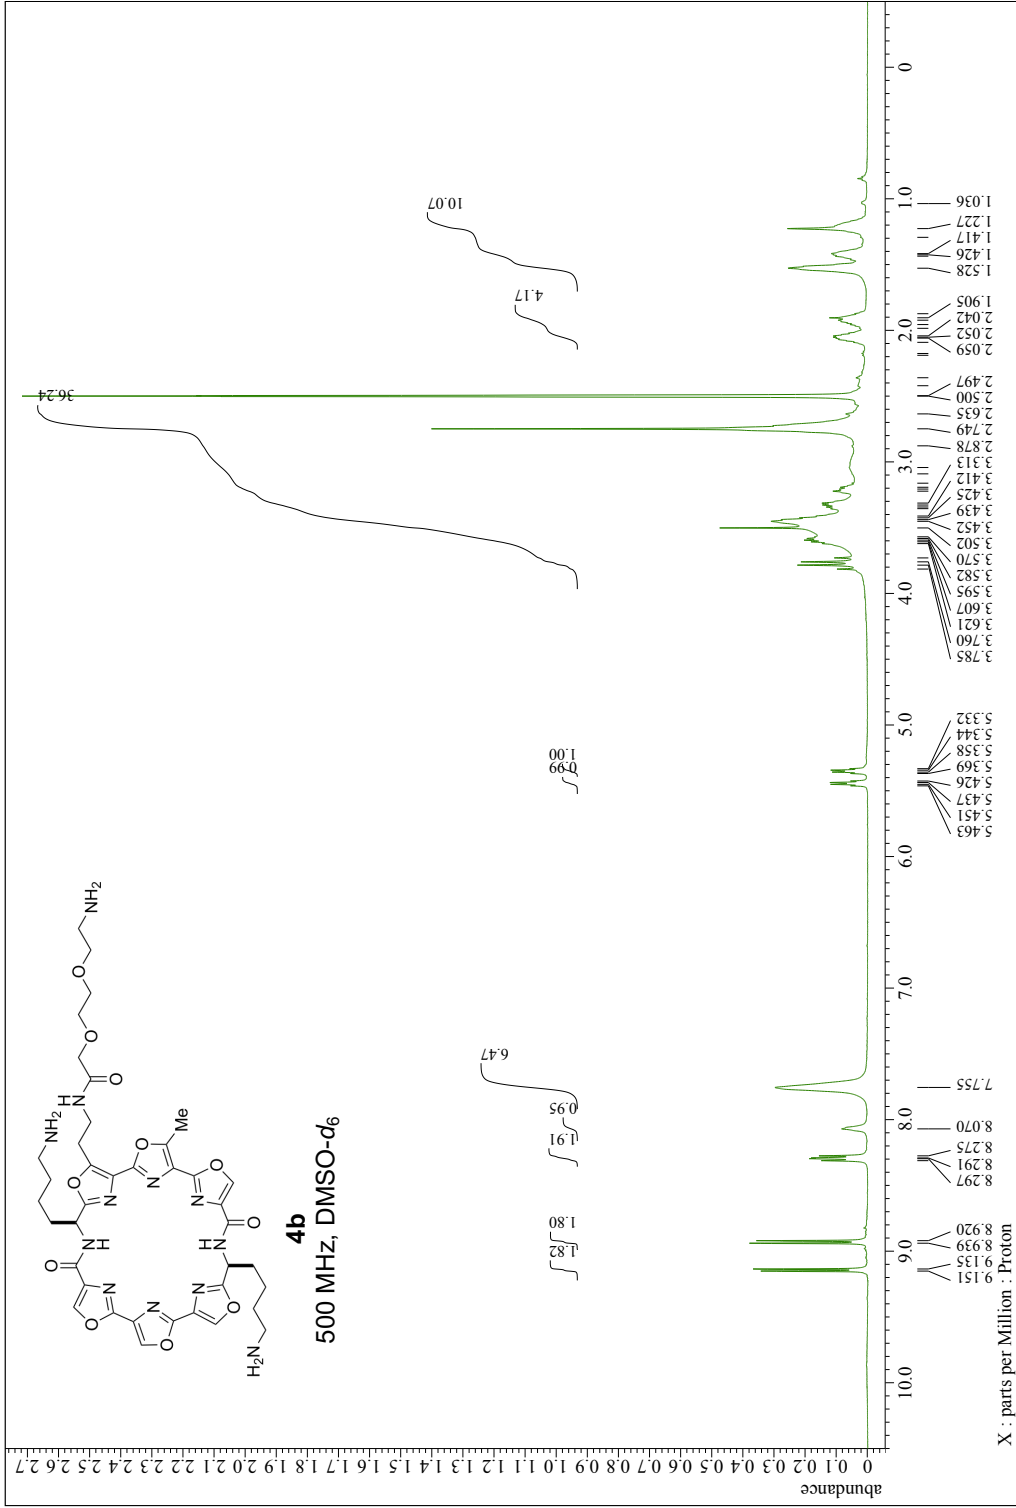

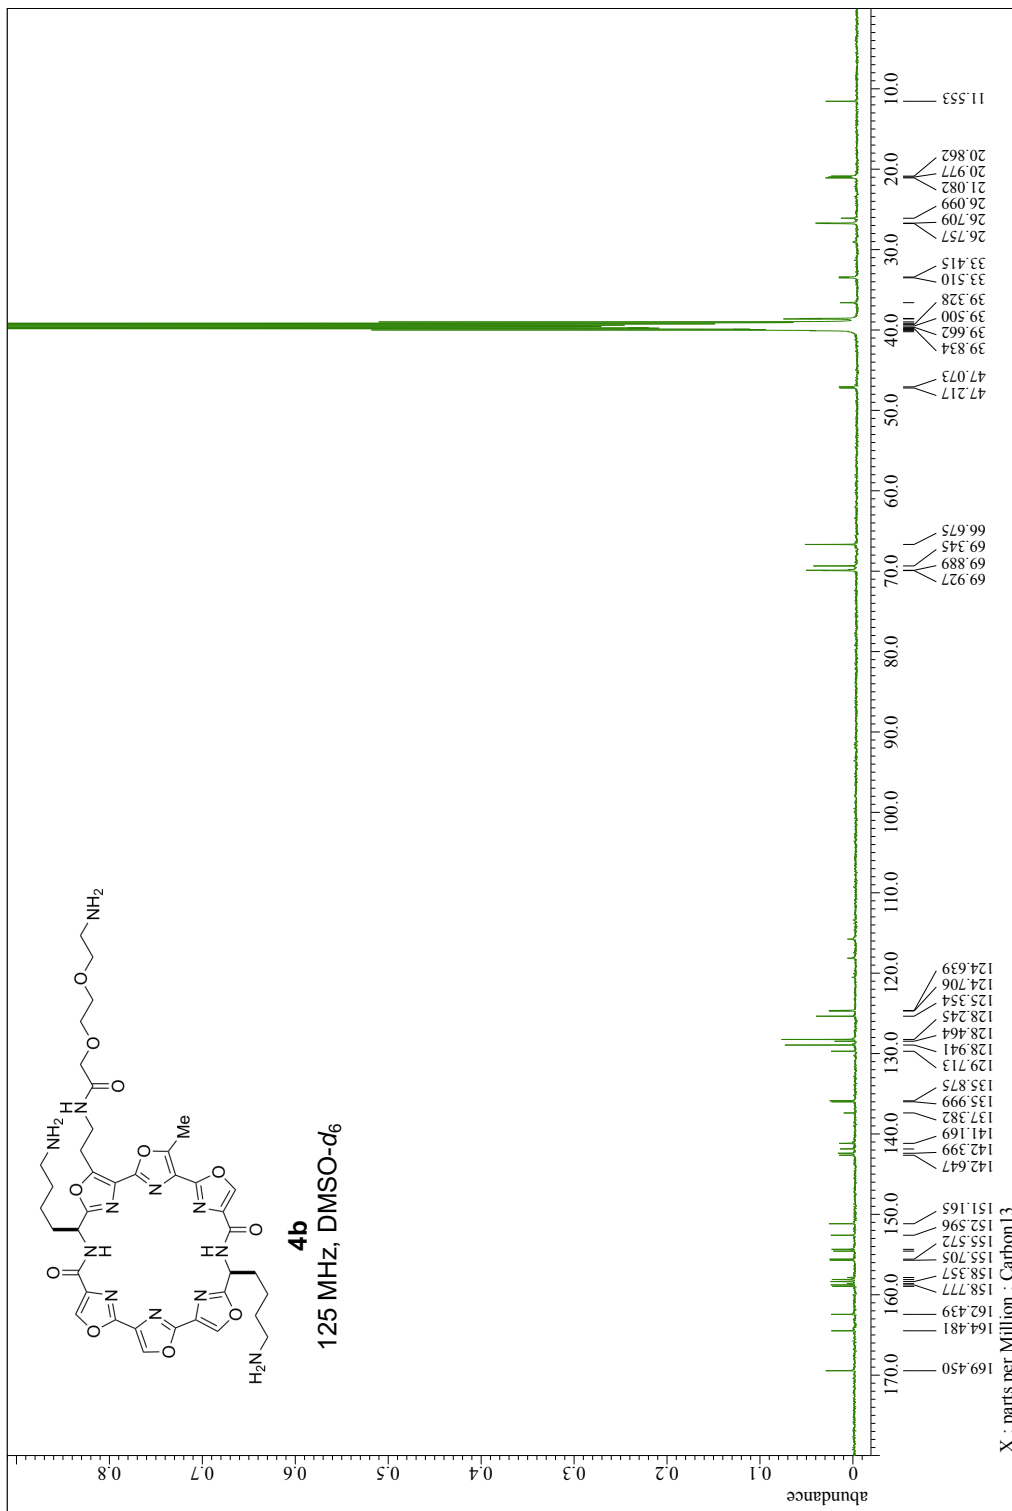

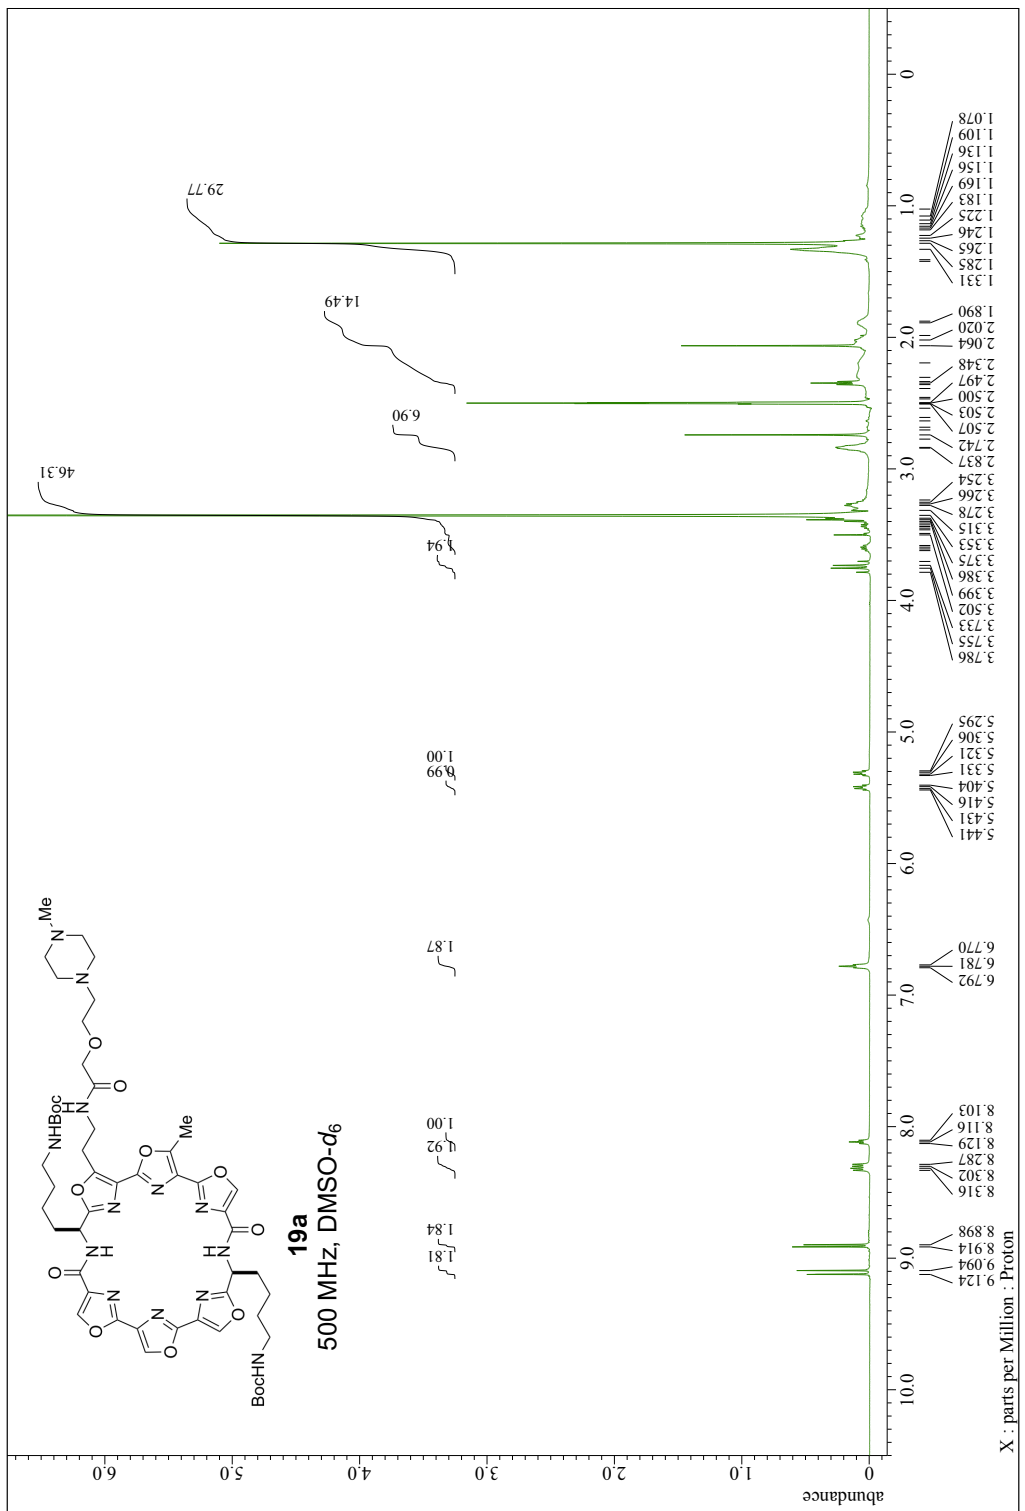

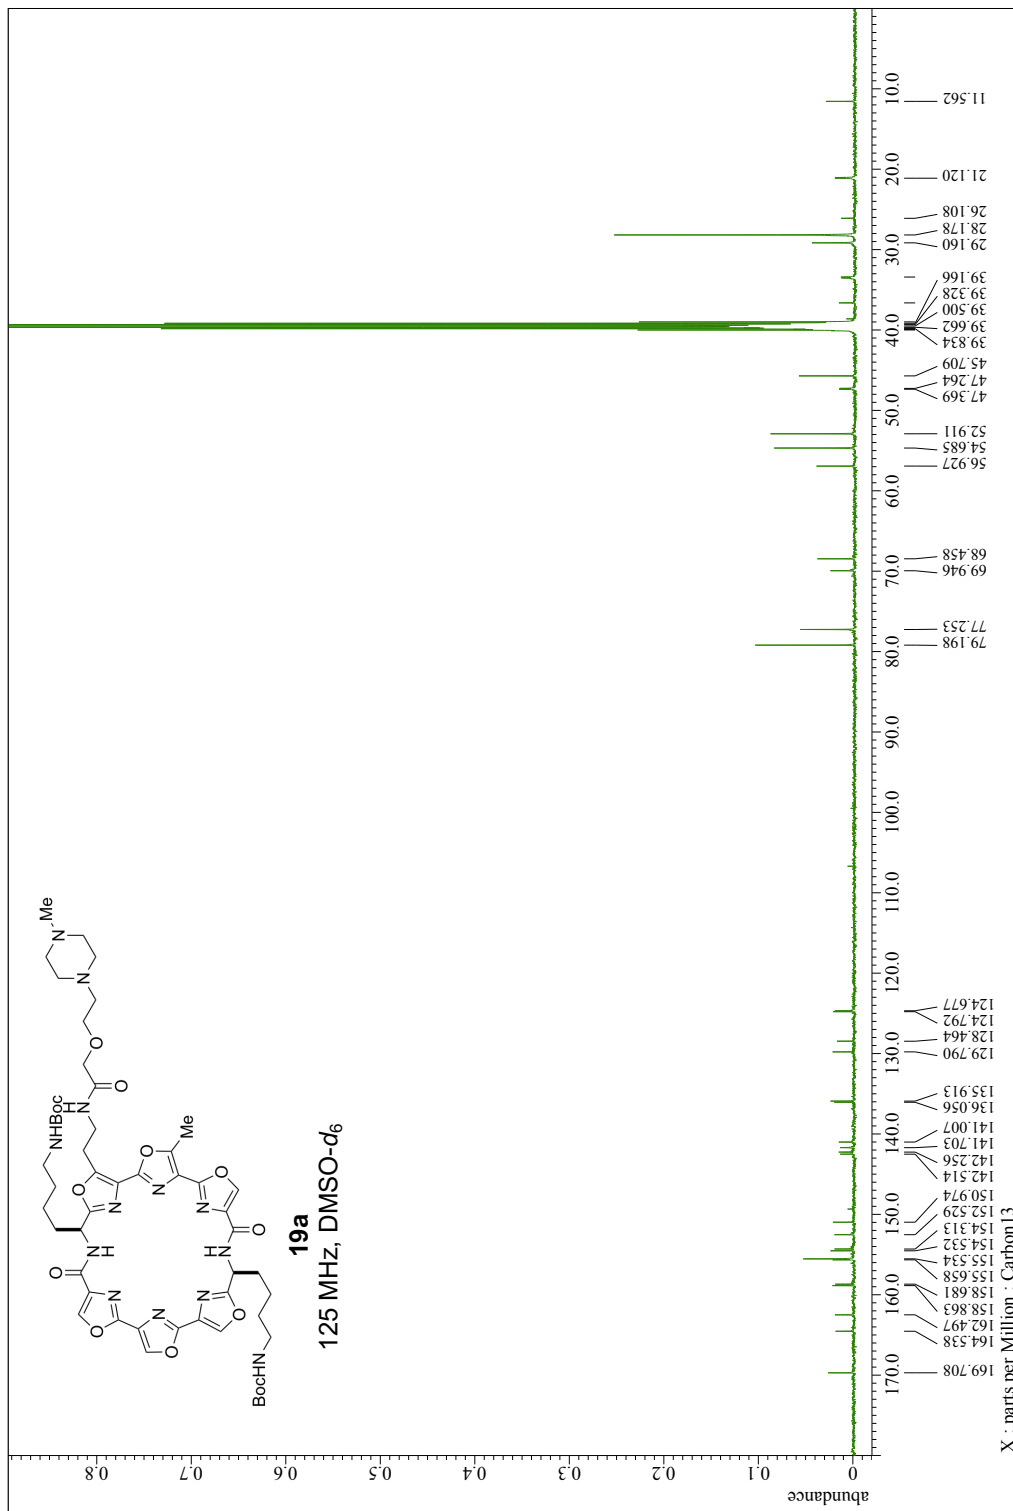

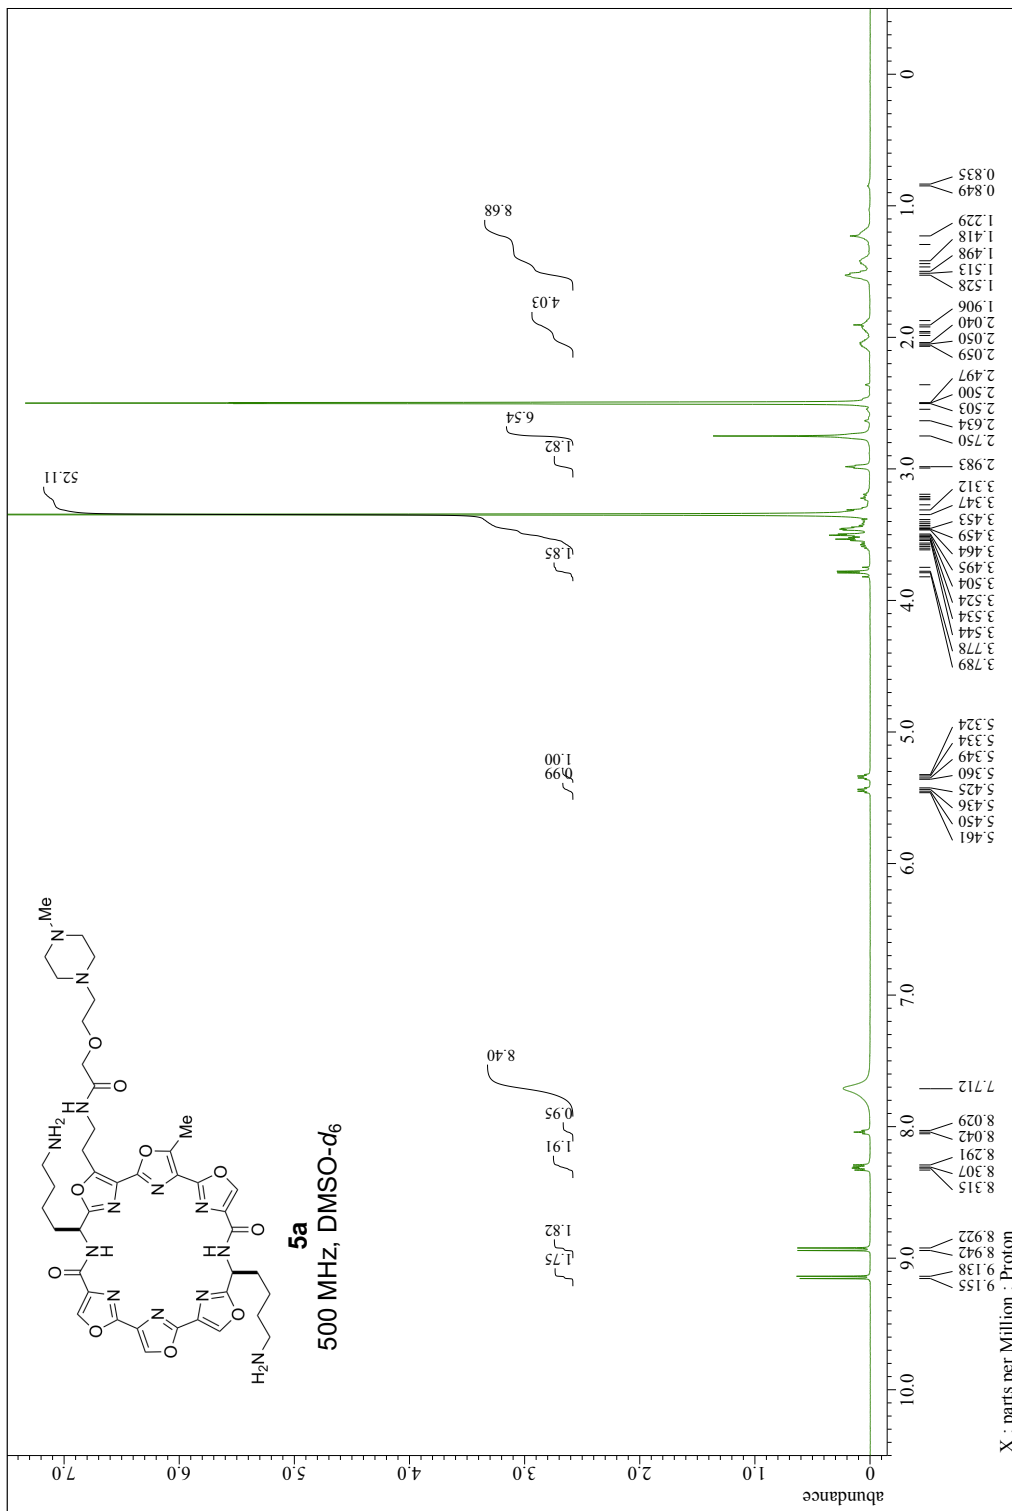

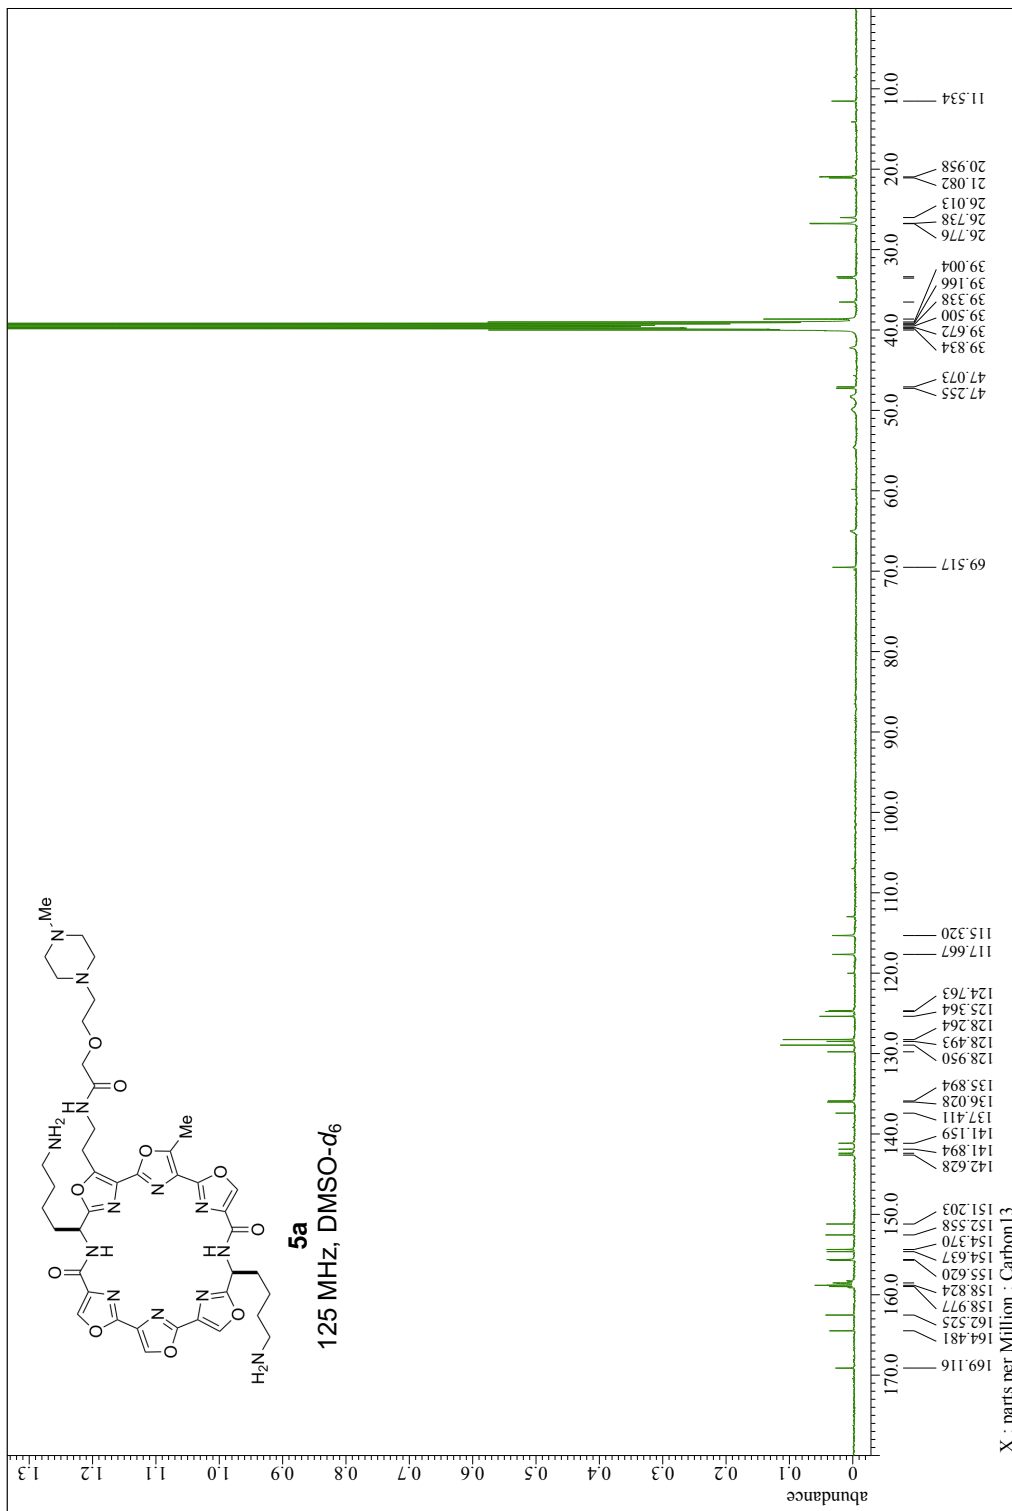



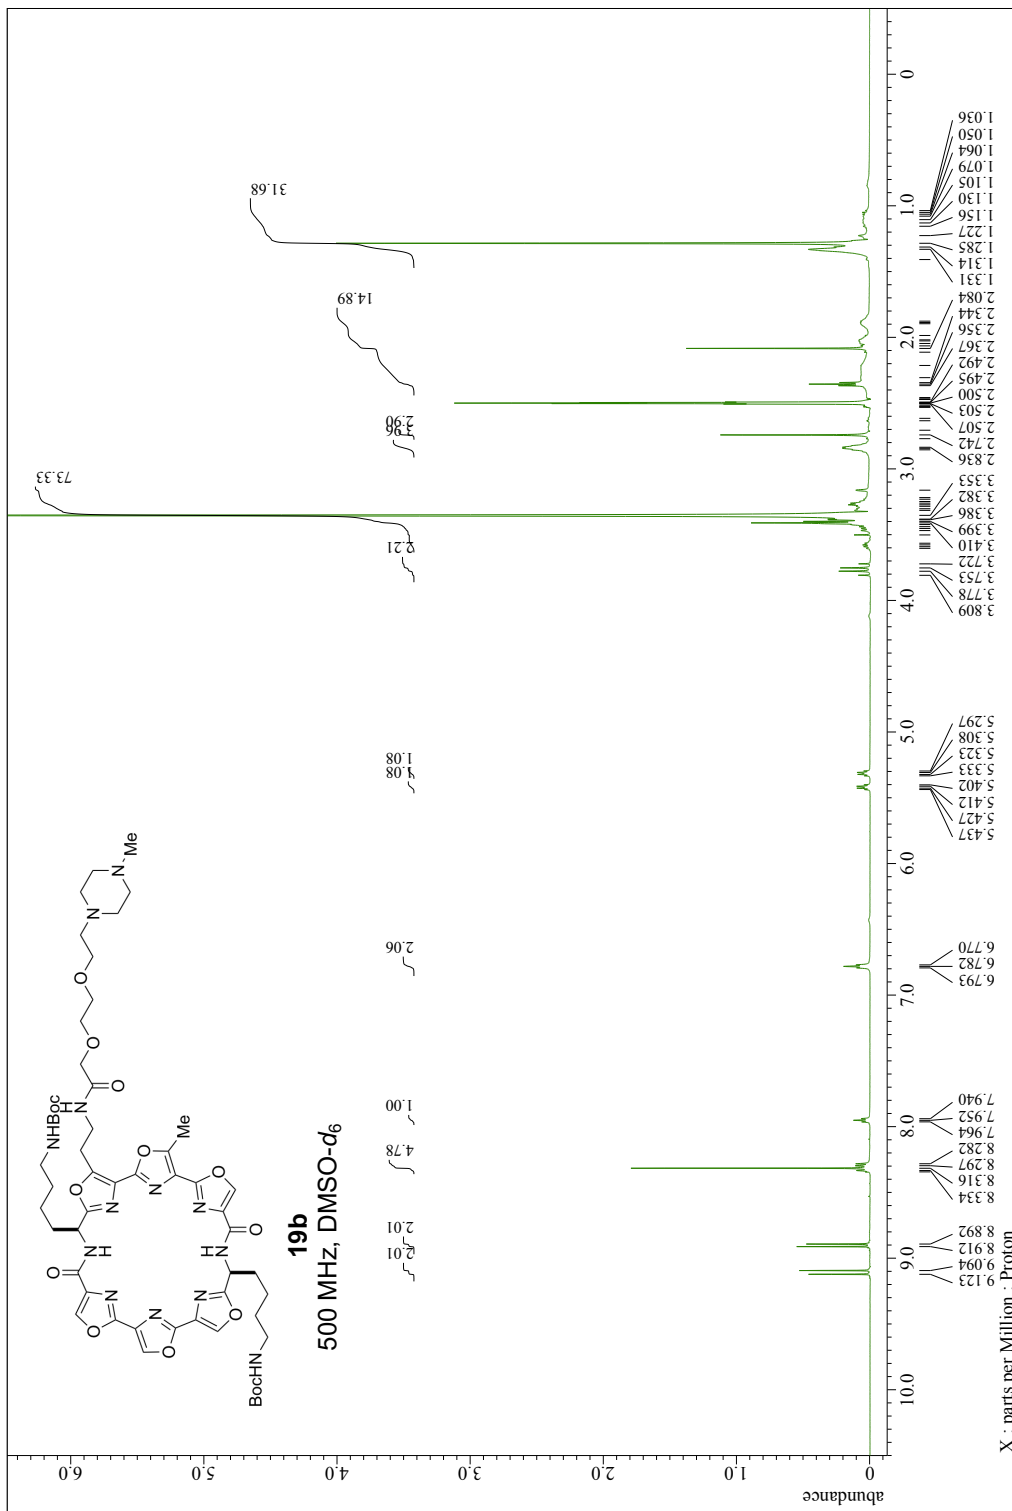

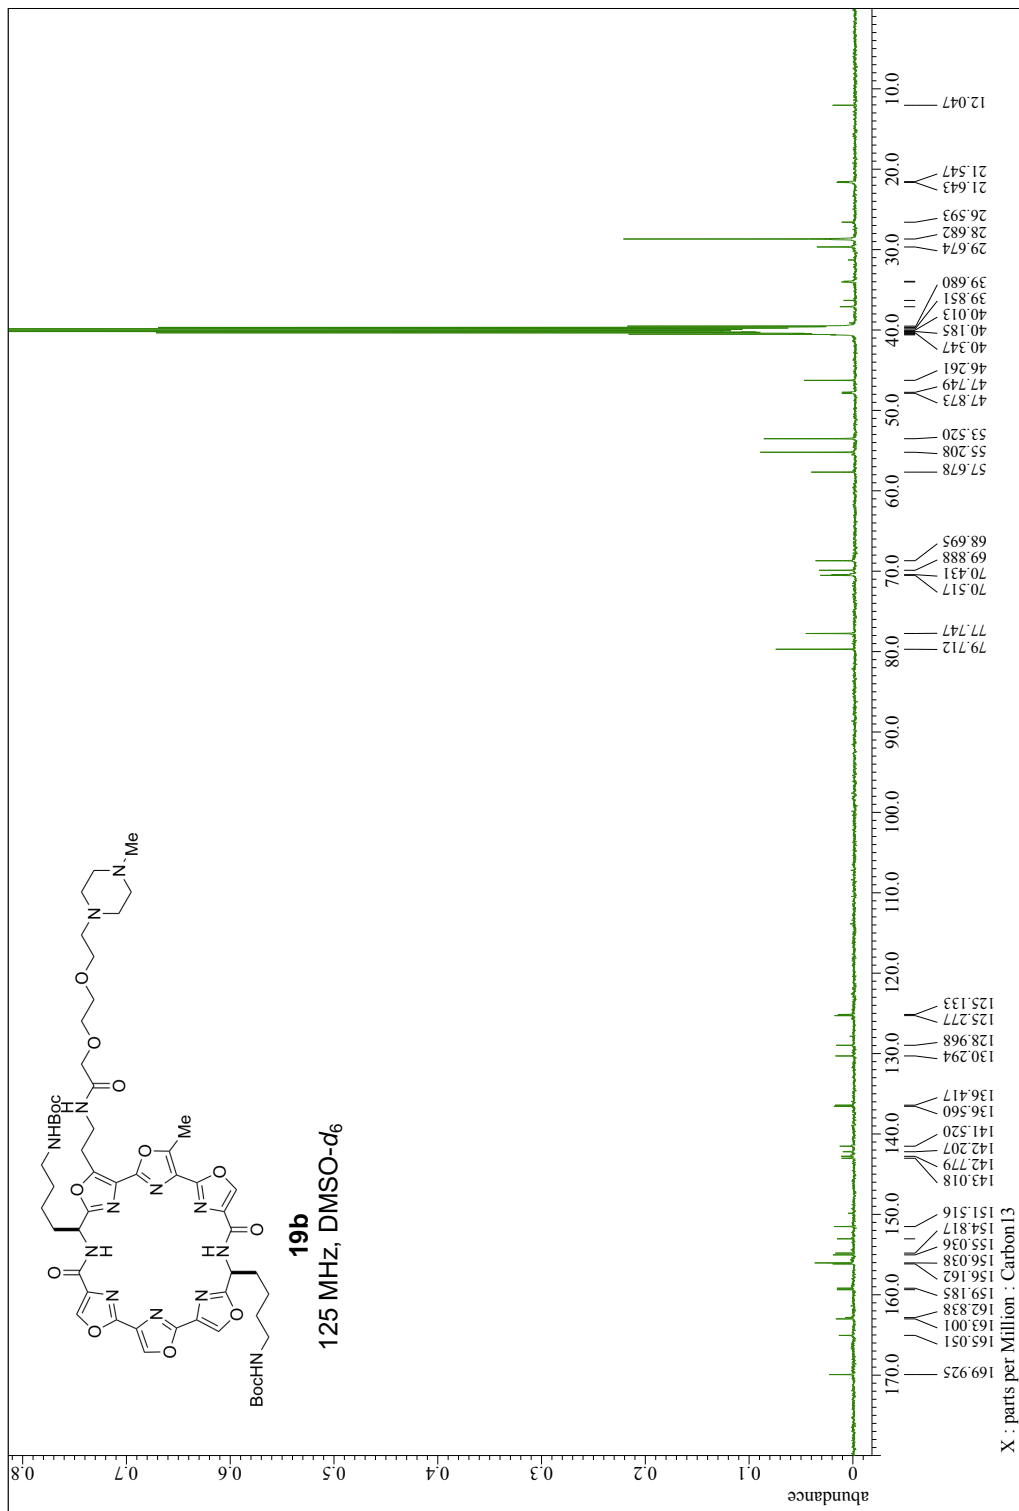

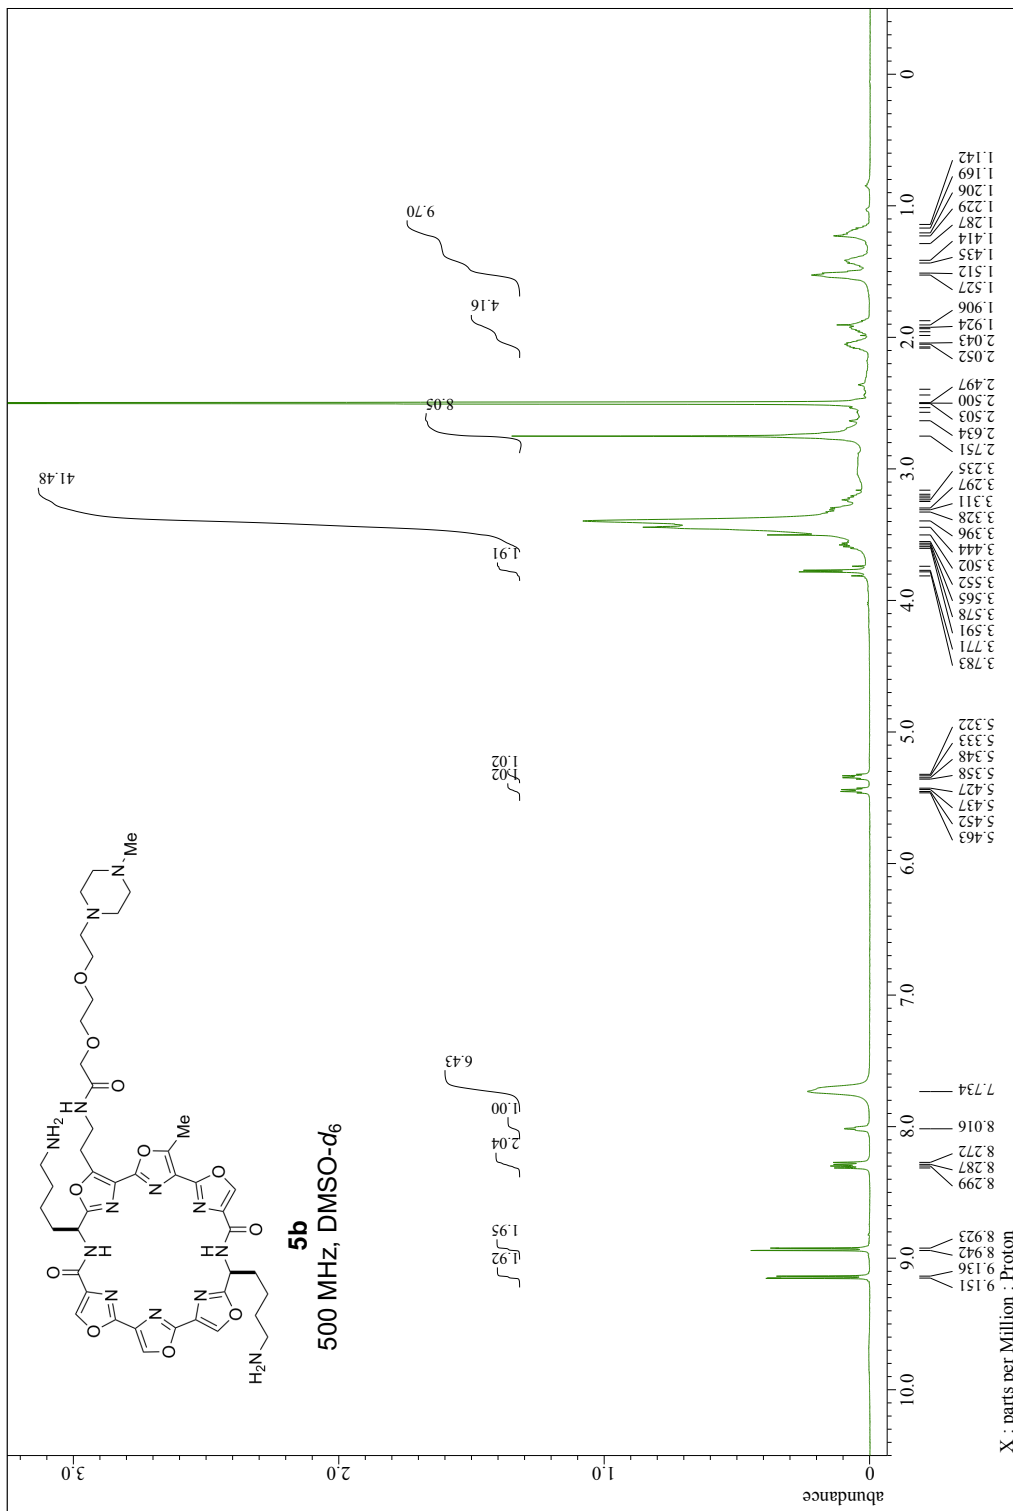

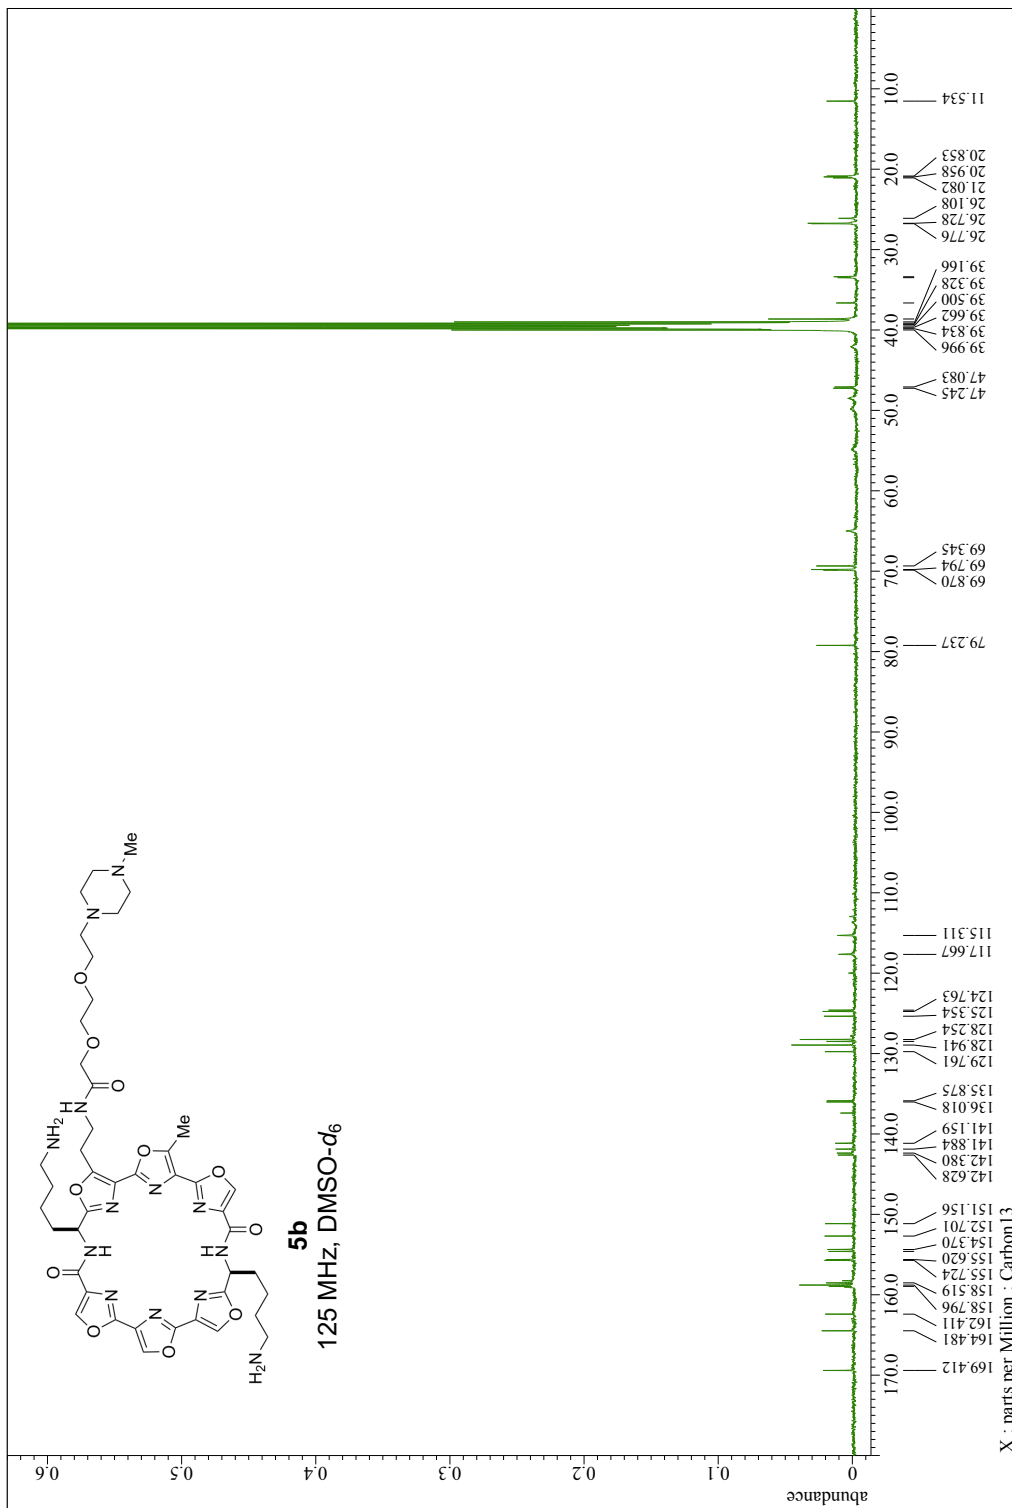

Supplement: molecules-24-00263-s001.pdf [file molecules-24-00263-s001.pdf]
